# Supplementary material for: Ferrocenyl pyrazaboles: design, synthesis, structure, and properties
Source: Royal Society of Chemistry journal article supplement (doi:10.1039/c3dt52315b), 2013-11-08
Supplement: c3dt52315b.pdf [file c3dt52315b.pdf]

## Supporting Information

# Ferrocenyl pyrazaboles: Design, Synthesis, Structure, and Properties

Rajneesh Misra,\* Thaksen Jadhav, and Shaikh M. Mobin

Department of Chemistry,  
Indian Institute of Technology Indore,  
Indore- 452 017, India.

[rajneeshmisra@iiti.ac.in](mailto:rajneeshmisra@iiti.ac.in)

## Table of Contents

**I. Crystallographic data**

**II. DFT Calculations**

**III. Copies of  $^1\text{H}$  NMR,  $^{13}\text{C}$  NMR and HRMS Spectra of the New Compounds**

## I. Crystallographic Data

Single crystal X-ray structural studies of **11a**, **11b**, and **4d** were performed on a CCD Agilent Technologies (Oxford Diffraction) SUPER NOVA diffractometer. Data were collected at 150(2) K using graphite-monochromated Mo K $\alpha$  radiation ( $\lambda_{\alpha} = 0.71073 \text{ \AA}$ ). The strategy for the Data collection was evaluated by using the CrysAlisPro CCD software. The data were collected by the standard 'phi-omega scan techniques, and were scaled and reduced using CrysAlisPro RED software. The structures were solved by direct methods using SHELXS-97, and refined by full matrix least-squares with SHELXL-97, refining on  $F^2$ . The positions of all the atoms were obtained by direct methods. All non-hydrogen atoms were refined anisotropically. The remaining hydrogen atoms were placed in geometrically constrained positions, and refined with isotropic temperature factors, generally  $1.2U_{eq}$  of their parent atoms. The crystal, and refinement data are summarized in Table 1. The CCDC numbers **950018**, **891091**, and **891092** contain the supplementary crystallographic data for **11a**, **11b**, and **11d** respectively. These data can be obtained free of charge via [www.ccdc.cam.ac.uk](http://www.ccdc.cam.ac.uk) (or from the Cambridge Crystallographic Data Centre, 12 Union Road, Cambridge CB21 3EZ, UK; Fax: (+44) 1223-336-033; or [deposit@ccdc.cam.ac.uk](mailto:deposit@ccdc.cam.ac.uk)).

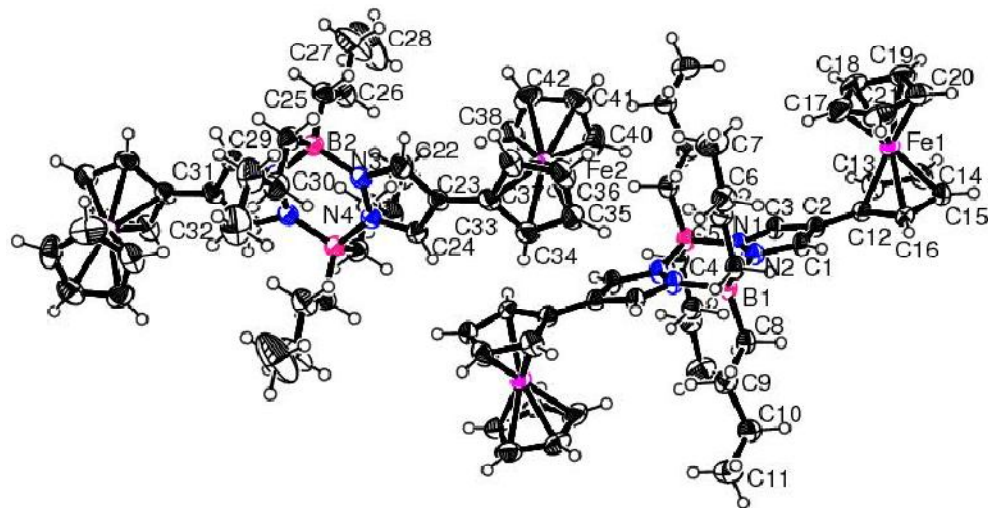

**Figure S1.** Crystal structure of **11a** (50% probability for thermal ellipsoids).

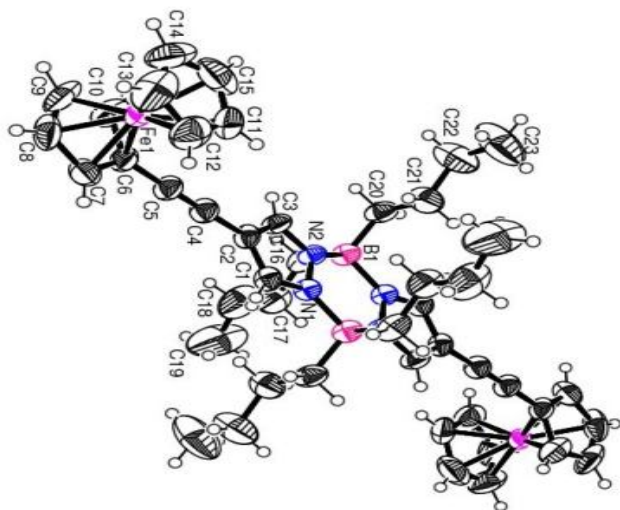

**Figure S2.** Crystal structure of **11b** (50% probability for thermal ellipsoids): Top view.

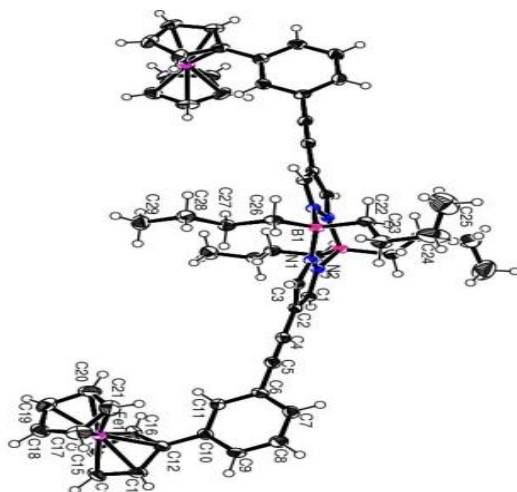

**Figure S3.** Crystal structure of **11d** (50% probability for thermal ellipsoids): Side view.

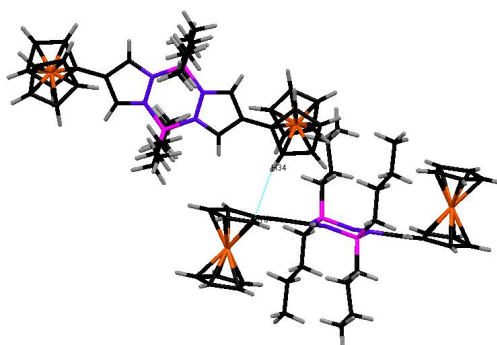

**Figure S4.** The two symmetry independent molecules in the crystal structures of **11a**.

**Table 1. Selected bond lengths and angles of compound 11a.**

| <b>Compound 11a</b>     |          |                      |          |
|-------------------------|----------|----------------------|----------|
| <b>Bond lengths (Å)</b> |          | <b>Bond angles °</b> |          |
| B(1)-N(1)#1             | 1.586(3) | N(2)#1-B(1)-N(1)     | 103.9(2) |
| B(1)-N(2)               | 1.588(3) | N(2)#1-B(1)-C(26)    | 109.3(2) |
| B(1)-C(4)               | 1.608(3) | N(1)-B(1)-C(26)      | 107.6(2) |
| B(1)-C(8)               | 1.625(3) | N(2)#1-B(1)-C(22)    | 106.9(2) |
| N(1)-C(3)               | 1.342(3) | N(1)-B(1)-C(22)      | 112.0(2) |
| N(1)-N(2)               | 1.359(2) | C(26)-B(1)-C(22)     | 116.4(2) |
| N(2)-C(1)               | 1.343(3) | C(3)-N(1)-N(2)       | 108.1(2) |
| C(1)-C(2)               | 1.387(3) | C(3)-N(1)-B(1)       | 126.5(2) |
| C(2)-C(3)               | 1.386(3) | N(2)-N(1)-B(1)       | 125.3(2) |
| B(1)-B(1)               | 3.267    | C(1)-N(2)-B(1)#1     | 126.6(2) |

**Table 2. Selected bond lengths, and bond angles of compound 11b.**

| <b>Compound 11b</b>     |           |                      |          |
|-------------------------|-----------|----------------------|----------|
| <b>Bond lengths (Å)</b> |           | <b>Bond angles °</b> |          |
| B(1)-N(1)               | 1.571(8)  | N(1)1-B(1)-N(2)      | 105.3(4) |
| B(1)-N(2)               | 1.591(7)  | N(1)1-B(1)-C(20)     | 111.0(5) |
| B(1)-C(20)              | 1.598(10) | N(2)-B(1)-C(20)      | 111.0(5) |
| B(1)-C(16)              | 1.619(10) | N(1)1-B(1)-C(16)     | 109.1(5) |
| N(1)-C(1)               | 1.350(7)  | N(2)-B(1)-C(16)      | 109.0(5) |
| N(1)-N(2)               | 1.350(6)  | C(20)-B(1)-C(16)     | 111.3(5) |

|           |          |                 |          |
|-----------|----------|-----------------|----------|
| N(2)-C(3) | 1.332(7) | C(1)-N(1)-N(2)  | 107.4(4) |
| C(1)-C(2) | 1.377(8) | N(2)-C(3)-C(2)  | 177.6(7) |
| C(2)-C(3) | 1.380(9) | C(1)-N(1)-B(1)1 | 124.9(5) |
| B(1)-B(1) | 3.251    | N(2)-N(1)-B(1)1 | 126.8(4) |

**Table 3. Selected bond lengths and bond angles of compound 11d.**

| <b>Compound 11d</b>     |          |                      |          |
|-------------------------|----------|----------------------|----------|
| <b>Bond lengths (Å)</b> |          | <b>Bond angles °</b> |          |
| B(1)-N(1)               | 1.597(4) | N(2)1-B(1)-N(1)      | 103.9(2) |
| B(1)-N(2)1              | 1.596(4) | N(2)1-B(1)-C(26)     | 109.3(2) |
| B(1)-C(26)              | 1.613(4) | N(1)-B(1)-C(26)      | 107.6(2) |
| B(1)-C(22)              | 1.614(4) | N(2)1-B(1)-C(22)     | 106.9(2) |
| N(1)-C(3)               | 1.334(4) | N(1)-B(1)-C(22)      | 112.0(2) |
| N(1)-N(2)               | 1.354(3) | C(26)-B(1)-C(22)     | 116.4(2) |
| N(2)-C(1)               | 1.337(4) | C(3)-N(1)-N(2)       | 108.1(2) |
| C(1)-C(2)               | 1.395(4) | C(3)-N(1)-B(1)       | 126.5(2) |
| C(2)-C(3)               | 1.389(4) | N(2)-N(1)-B(1)       | 125.3(2) |
| B(1)-B(1)               | 3.179    | C(1)-N(2)-B(1)1      | 126.6(2) |

## DFT Calculations.

Calculation method: B3LYP/6-31+G\*\* for C, H, N, B, and Lanl2DZ for Fe with Gaussian 09

DFT Data for ferrocenyl pyrazaboles.

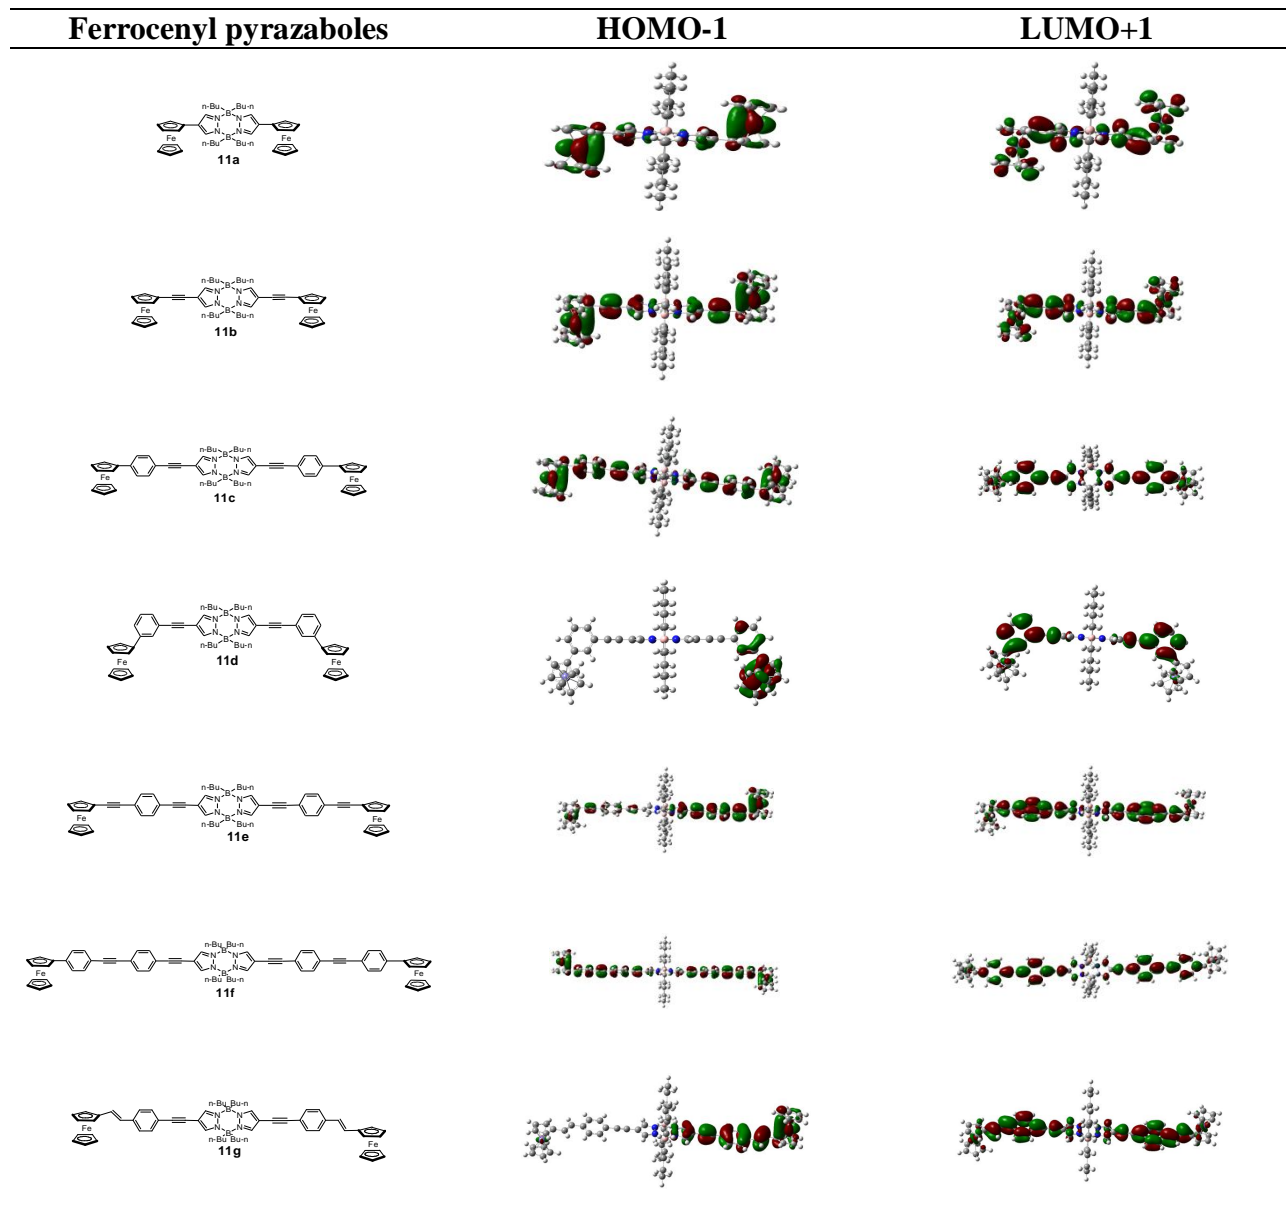

**Figure S5-** HOMO-1, and LUMO+1 frontier orbitals of BODIPYs at the B3LYP/6-31+G\*\* for C, N, B, H, and Lanl2DZ for Fe level

## Ferrocenyl pyrazabole 11a

Standard orientation:

| Center<br>Number | Atomic<br>Number | Atomic<br>Type | Coordinates (Angstroms) |           |           |
|------------------|------------------|----------------|-------------------------|-----------|-----------|
|                  |                  |                | X                       | Y         | Z         |
| 1                | 7                | 0              | -1.151997               | 0.381451  | 0.766869  |
| 2                | 7                | 0              | -1.254706               | 0.380486  | -0.584705 |
| 3                | 6                | 0              | -2.501471               | 0.765777  | -0.912929 |
| 4                | 1                | 0              | -2.794272               | 0.823266  | -1.949813 |
| 5                | 6                | 0              | -3.240228               | 1.028444  | 0.245281  |
| 6                | 6                | 0              | -2.334136               | 0.771457  | 1.278326  |
| 7                | 1                | 0              | -2.459386               | 0.856309  | 2.346553  |
| 8                | 6                | 0              | 0.608061                | 1.326220  | 2.495481  |
| 9                | 1                | 0              | -0.172274               | 1.540254  | 3.243068  |
| 10               | 1                | 0              | 1.481723                | 1.028403  | 3.097027  |
| 11               | 6                | 0              | -0.188043               | -1.226238 | 2.629448  |
| 12               | 1                | 0              | 0.714813                | -1.414800 | 3.232030  |
| 13               | 1                | 0              | -0.935174               | -0.889150 | 3.365570  |
| 14               | 6                | 0              | 0.943740                | 2.627149  | 1.753795  |
| 15               | 1                | 0              | 0.073173                | 2.958485  | 1.170543  |
| 16               | 1                | 0              | 1.739368                | 2.442353  | 1.017956  |
| 17               | 5                | 0              | 0.130909                | 0.025596  | 1.633279  |
| 18               | 6                | 0              | -0.661167               | -2.555518 | 2.025907  |
| 19               | 1                | 0              | 0.081004                | -2.923231 | 1.303756  |
| 20               | 1                | 0              | -1.582297               | -2.394681 | 1.448236  |
| 21               | 7                | 0              | 1.151847                | -0.381444 | -0.766775 |
| 22               | 7                | 0              | 1.254653                | -0.380165 | 0.584792  |
| 23               | 6                | 0              | 2.501430                | -0.765430 | 0.913013  |
| 24               | 1                | 0              | 2.794303                | -0.822698 | 1.949888  |
| 25               | 6                | 0              | 3.240099                | -1.028370 | -0.245189 |
| 26               | 6                | 0              | 2.333935                | -0.771606 | -1.278226 |
| 27               | 1                | 0              | 2.459129                | -0.856657 | -2.346443 |
| 28               | 6                | 0              | -0.608353               | -1.325990 | -2.495380 |
| 29               | 1                | 0              | 0.171983                | -1.540168 | -3.242928 |
| 30               | 1                | 0              | -1.481925               | -1.028021 | -3.096978 |
| 31               | 6                | 0              | 0.188132                | 1.226362  | -2.629352 |
| 32               | 1                | 0              | -0.714740               | 1.415184  | -3.231829 |
| 33               | 1                | 0              | 0.935116                | 0.889147  | -3.365562 |
| 34               | 6                | 0              | -0.944306               | -2.626845 | -1.753699 |
| 35               | 1                | 0              | -0.073823               | -2.958355 | -1.170420 |
| 36               | 1                | 0              | -1.739914               | -2.441884 | -1.017875 |
| 37               | 5                | 0              | -0.131009               | -0.025433 | -1.633187 |
| 38               | 6                | 0              | 0.661640                | 2.555487  | -2.025756 |
| 39               | 1                | 0              | -0.080363               | 2.923329  | -1.303500 |
| 40               | 1                | 0              | 1.582790                | 2.394368  | -1.448195 |
| 41               | 6                | 0              | 1.380801                | 3.771094  | 2.680273  |
| 42               | 1                | 0              | 0.586835                | 3.959528  | 3.416428  |



|    |    |   |           |           |           |
|----|----|---|-----------|-----------|-----------|
| 43 | 1  | 0 | 2.256973  | 3.449997  | 3.261142  |
| 44 | 6  | 0 | 0.920071  | 3.650641  | -3.070901 |
| 45 | 1  | 0 | 1.661844  | 3.287656  | -3.796287 |
| 46 | 1  | 0 | -0.000456 | 3.823876  | -3.645749 |
| 47 | 6  | 0 | 1.401369  | 4.973604  | -2.466417 |
| 48 | 1  | 0 | 2.338659  | 4.839102  | -1.913869 |
| 49 | 1  | 0 | 1.577254  | 5.730194  | -3.238793 |
| 50 | 1  | 0 | 0.664262  | 5.380363  | -1.764498 |
| 51 | 6  | 0 | 1.707956  | 5.071422  | 1.939013  |
| 52 | 1  | 0 | 2.522796  | 4.925175  | 1.220438  |
| 53 | 1  | 0 | 0.839757  | 5.437372  | 1.378774  |
| 54 | 1  | 0 | 2.014401  | 5.863448  | 2.630832  |
| 55 | 6  | 0 | -0.919417 | -3.650651 | 3.071121  |
| 56 | 1  | 0 | -1.661361 | -3.287801 | 3.796397  |
| 57 | 1  | 0 | 0.001098  | -3.823587 | 3.646079  |
| 58 | 6  | 0 | -1.381581 | -3.770708 | -2.680177 |
| 59 | 1  | 0 | -0.587646 | -3.959300 | -3.416323 |
| 60 | 1  | 0 | -2.257687 | -3.449445 | -3.261055 |
| 61 | 6  | 0 | -1.709004 | -5.070965 | -1.938907 |
| 62 | 1  | 0 | -2.015599 | -5.862939 | -2.630719 |
| 63 | 1  | 0 | -0.840886 | -5.437079 | -1.378652 |
| 64 | 1  | 0 | -2.523827 | -4.924543 | -1.220348 |
| 65 | 6  | 0 | -1.400291 | -4.973797 | 2.466700  |
| 66 | 1  | 0 | -1.576092 | -5.730358 | 3.239124  |
| 67 | 1  | 0 | -2.337534 | -4.839589 | 1.914003  |
| 68 | 1  | 0 | -0.662978 | -5.380438 | 1.764928  |
| 69 | 6  | 0 | -4.622108 | 1.492513  | 0.360858  |
| 70 | 26 | 0 | -6.377741 | 0.401191  | 0.032414  |
| 71 | 6  | 0 | -5.430860 | 1.463455  | 1.545594  |
| 72 | 6  | 0 | -5.411358 | 2.099168  | -0.672898 |
| 73 | 6  | 0 | -6.692505 | 2.057195  | 1.246539  |
| 74 | 6  | 0 | -6.681289 | 2.448038  | -0.125780 |
| 75 | 6  | 0 | -5.868177 | -1.526449 | -0.557096 |
| 76 | 6  | 0 | -6.677888 | -0.905767 | -1.555853 |
| 77 | 6  | 0 | -7.929988 | -0.564229 | -0.959929 |
| 78 | 6  | 0 | -7.893260 | -0.972703 | 0.407570  |
| 79 | 6  | 0 | -6.618859 | -1.567318 | 0.656501  |
| 80 | 1  | 0 | -5.141689 | 1.035993  | 2.495909  |
| 81 | 1  | 0 | -5.096226 | 2.259949  | -1.694896 |
| 82 | 1  | 0 | -7.523336 | 2.157861  | 1.930933  |
| 83 | 1  | 0 | -7.500679 | 2.902119  | -0.665671 |
| 84 | 1  | 0 | -4.849906 | -1.867184 | -0.686014 |
| 85 | 1  | 0 | -6.385187 | -0.705359 | -2.577413 |
| 86 | 1  | 0 | -8.749248 | -0.055655 | -1.449504 |
| 87 | 1  | 0 | -8.679035 | -0.826036 | 1.135908  |
| 88 | 1  | 0 | -6.271675 | -1.952974 | 1.605223  |
| 89 | 6  | 0 | 4.621964  | -1.492485 | -0.360802 |
| 90 | 26 | 0 | 6.377740  | -0.401316 | -0.032484 |
| 91 | 6  | 0 | 5.411230  | -2.099240 | 0.672875  |
| 92 | 6  | 0 | 5.430627  | -1.463480 | -1.545604 |
| 93 | 6  | 0 | 6.681090  | -2.448204 | 0.125652  |
| 94 | 6  | 0 | 6.692241  | -2.057334 | -1.246659 |

|     |   |   |          |           |           |
|-----|---|---|----------|-----------|-----------|
| 95  | 6 | 0 | 5.868703 | 1.526544  | 0.556725  |
| 96  | 6 | 0 | 6.619435 | 1.567009  | -0.656857 |
| 97  | 6 | 0 | 7.893650 | 0.972045  | -0.407800 |
| 98  | 6 | 0 | 7.930220 | 0.563761  | 0.959760  |
| 99  | 6 | 0 | 6.678202 | 0.905760  | 1.555598  |
| 100 | 1 | 0 | 5.096138 | -2.260038 | 1.694884  |
| 101 | 1 | 0 | 5.141406 | -1.035947 | -2.495871 |
| 102 | 1 | 0 | 7.500490 | -2.902350 | 0.665476  |
| 103 | 1 | 0 | 7.523005 | -2.158064 | -1.931126 |
| 104 | 1 | 0 | 4.850539 | 1.867623  | 0.685572  |
| 105 | 1 | 0 | 6.272383 | 1.952610  | -1.605650 |
| 106 | 1 | 0 | 8.679391 | 0.825044  | -1.136109 |
| 107 | 1 | 0 | 8.749305 | 0.054994  | 1.449428  |
| 108 | 1 | 0 | 6.385404 | 0.705595  | 2.577178  |

-----  
Total Energy (HF) = -2151.1883873 Hartree

### Ferrocenyl pyrazabole 11b

Standard orientation:

| Center<br>Number | Atomic<br>Number | Atomic<br>Type | Coordinates (Angstroms) |           |           |
|------------------|------------------|----------------|-------------------------|-----------|-----------|
|                  |                  |                | X                       | Y         | Z         |
| 1                | 7                | 0              | 1.236335                | -0.249353 | -0.686089 |
| 2                | 7                | 0              | 1.245329                | -0.248422 | 0.672089  |
| 3                | 6                | 0              | 2.496981                | -0.498523 | 1.088596  |
| 4                | 1                | 0              | 2.729729                | -0.541741 | 2.140788  |
| 5                | 6                | 0              | 3.338667                | -0.669320 | -0.020462 |
| 6                | 6                | 0              | 2.482086                | -0.500768 | -1.118469 |
| 7                | 1                | 0              | 2.700863                | -0.548326 | -2.173449 |
| 8                | 6                | 0              | 0.244409                | 1.289367  | -2.590689 |
| 9                | 1                | 0              | 1.078054                | 1.049798  | -3.269797 |
| 10               | 1                | 0              | -0.624157               | 1.393168  | -3.260154 |
| 11               | 6                | 0              | -0.285124               | -1.335528 | -2.552276 |
| 12               | 1                | 0              | -1.127788               | -1.112859 | -3.225983 |
| 13               | 1                | 0              | 0.574492                | -1.459589 | -3.229808 |
| 14               | 6                | 0              | 0.521829                | 2.648423  | -1.933629 |
| 15               | 1                | 0              | 1.402730                | 2.574617  | -1.280513 |
| 16               | 1                | 0              | -0.314625               | 2.921979  | -1.275432 |
| 17               | 5                | 0              | -0.012800               | -0.010874 | -1.641446 |
| 18               | 6                | 0              | -0.556310               | -2.674616 | -1.853107 |
| 19               | 1                | 0              | -1.427872               | -2.579085 | -1.190171 |
| 20               | 1                | 0              | 0.288476                | -2.931690 | -1.198865 |
| 21               | 7                | 0              | -1.236532               | 0.252666  | 0.686544  |
| 22               | 7                | 0              | -1.245794               | 0.250418  | -0.671628 |
| 23               | 6                | 0              | -2.497602               | 0.499782  | -1.088126 |

|    |    |   |           |           |           |
|----|----|---|-----------|-----------|-----------|
| 24 | 1  | 0 | -2.730530 | 0.542074  | -2.140315 |
| 25 | 6  | 0 | -3.339125 | 0.671340  | 0.020934  |
| 26 | 6  | 0 | -2.482274 | 0.504087  | 1.118932  |
| 27 | 1  | 0 | -2.700911 | 0.552357  | 2.173907  |
| 28 | 6  | 0 | -0.245406 | -1.286422 | 2.591221  |
| 29 | 1  | 0 | -1.078181 | -1.045964 | 3.271078  |
| 30 | 1  | 0 | 0.623612  | -1.391331 | 3.259925  |
| 31 | 6  | 0 | 0.285533  | 1.338189  | 2.552677  |
| 32 | 1  | 0 | 1.127337  | 1.114669  | 3.227177  |
| 33 | 1  | 0 | -0.574547 | 1.463383  | 3.229413  |
| 34 | 6  | 0 | -0.524967 | -2.645075 | 1.934228  |
| 35 | 1  | 0 | -1.406574 | -2.570251 | 1.282162  |
| 36 | 1  | 0 | 0.310419  | -2.919353 | 1.274998  |
| 37 | 5  | 0 | 0.012494  | 0.013646  | 1.641906  |
| 38 | 6  | 0 | 0.558886  | 2.676845  | 1.853518  |
| 39 | 1  | 0 | 1.431174  | 2.580301  | 1.191667  |
| 40 | 1  | 0 | -0.284832 | 2.934612  | 1.198194  |
| 41 | 6  | 0 | 0.748824  | 3.784990  | -2.941358 |
| 42 | 1  | 0 | 1.590115  | 3.520914  | -3.597342 |
| 43 | 1  | 0 | -0.129334 | 3.864659  | -3.597255 |
| 44 | 6  | 0 | 0.803231  | 3.841580  | 2.824261  |
| 45 | 1  | 0 | -0.067468 | 3.946548  | 3.486551  |
| 46 | 1  | 0 | 1.649820  | 3.592110  | 3.479140  |
| 47 | 6  | 0 | 1.075051  | 5.176133  | 2.122616  |
| 48 | 1  | 0 | 0.230842  | 5.469131  | 1.487882  |
| 49 | 1  | 0 | 1.244636  | 5.983436  | 2.843257  |
| 50 | 1  | 0 | 1.960804  | 5.113131  | 1.479843  |
| 51 | 6  | 0 | 1.019751  | 5.141534  | -2.282904 |
| 52 | 1  | 0 | 0.178581  | 5.450661  | -1.651763 |
| 53 | 1  | 0 | 1.909957  | 5.101669  | -1.644466 |
| 54 | 1  | 0 | 1.181161  | 5.927045  | -3.029072 |
| 55 | 6  | 0 | -0.800638 | -3.839369 | -2.823831 |
| 56 | 1  | 0 | 0.069191  | -3.943041 | -3.487467 |
| 57 | 1  | 0 | -1.648523 | -3.590755 | -3.477359 |
| 58 | 6  | 0 | -0.751988 | -3.781617 | 2.941978  |
| 59 | 1  | 0 | -1.591987 | -3.516645 | 3.599254  |
| 60 | 1  | 0 | 0.127015  | -3.862619 | 3.596578  |
| 61 | 6  | 0 | -1.025647 | -5.137619 | 2.283533  |
| 62 | 1  | 0 | -1.186709 | -5.923191 | 3.029712  |
| 63 | 1  | 0 | -1.916926 | -5.096479 | 1.646665  |
| 64 | 1  | 0 | -0.185954 | -5.447525 | 1.650815  |
| 65 | 6  | 0 | -1.069714 | -5.174475 | -2.122183 |
| 66 | 1  | 0 | -1.239683 | -5.981712 | -2.842809 |
| 67 | 1  | 0 | -0.224018 | -5.466758 | -1.489095 |
| 68 | 1  | 0 | -1.954356 | -5.112700 | -1.477771 |
| 69 | 6  | 0 | -4.727211 | 0.943907  | 0.033751  |
| 70 | 6  | 0 | -5.918188 | 1.185229  | 0.053142  |
| 71 | 6  | 0 | -7.305580 | 1.477869  | 0.086580  |
| 72 | 26 | 0 | -8.887396 | 0.123161  | -0.000546 |
| 73 | 6  | 0 | -8.125477 | 1.580703  | 1.266775  |
| 74 | 6  | 0 | -8.151209 | 1.760762  | -1.044948 |
| 75 | 6  | 0 | -9.443826 | 1.933619  | 0.862550  |

|     |    |   |            |           |           |
|-----|----|---|------------|-----------|-----------|
| 76  | 6  | 0 | -9.459811  | 2.043842  | -0.561371 |
| 77  | 6  | 0 | -8.106773  | -1.794317 | -0.177215 |
| 78  | 6  | 0 | -8.951760  | -1.504861 | -1.290695 |
| 79  | 6  | 0 | -10.260092 | -1.224925 | -0.790620 |
| 80  | 6  | 0 | -10.222781 | -1.340643 | 0.631744  |
| 81  | 6  | 0 | -8.891320  | -1.691946 | 1.010975  |
| 82  | 1  | 0 | -7.785207  | 1.402956  | 2.276943  |
| 83  | 1  | 0 | -7.834892  | 1.742385  | -2.078147 |
| 84  | 1  | 0 | -10.293534 | 2.060691  | 1.518828  |
| 85  | 1  | 0 | -10.323864 | 2.269463  | -1.170966 |
| 86  | 1  | 0 | -7.046512  | -2.002552 | -0.221550 |
| 87  | 1  | 0 | -8.647302  | -1.472382 | -2.327702 |
| 88  | 1  | 0 | -11.120078 | -0.942953 | -1.382613 |
| 89  | 1  | 0 | -11.048788 | -1.160038 | 1.305874  |
| 90  | 1  | 0 | -8.532499  | -1.826344 | 2.022095  |
| 91  | 6  | 0 | 4.726600   | -0.942663 | -0.033139 |
| 92  | 6  | 0 | 5.917376   | -1.184998 | -0.052218 |
| 93  | 6  | 0 | 7.304475   | -1.479068 | -0.085083 |
| 94  | 26 | 0 | 8.887962   | -0.126190 | -0.000160 |
| 95  | 6  | 0 | 8.149625   | -1.761049 | 1.047020  |
| 96  | 6  | 0 | 8.124381   | -1.584973 | -1.265011 |
| 97  | 6  | 0 | 9.457913   | -2.046636 | 0.564091  |
| 98  | 6  | 0 | 9.442240   | -1.938856 | -0.860015 |
| 99  | 6  | 0 | 8.109130   | 1.792808  | 0.167944  |
| 100 | 6  | 0 | 8.898779   | 1.686249  | -1.016488 |
| 101 | 6  | 0 | 10.228086  | 1.334204  | -0.630461 |
| 102 | 6  | 0 | 10.258960  | 1.222193  | 0.792348  |
| 103 | 6  | 0 | 8.948798   | 1.505129  | 1.285909  |
| 104 | 1  | 0 | 7.833221   | -1.740554 | 2.080155  |
| 105 | 1  | 0 | 7.784472   | -1.408569 | -2.275534 |
| 106 | 1  | 0 | 10.321588  | -2.272288 | 1.174208  |
| 107 | 1  | 0 | 10.291900  | -2.068129 | -1.515926 |
| 108 | 1  | 0 | 7.048974   | 2.002625  | 0.207058  |
| 109 | 1  | 0 | 8.544644   | 1.818472  | -2.029546 |
| 110 | 1  | 0 | 11.056888  | 1.150787  | -1.300383 |
| 111 | 1  | 0 | 11.115926  | 0.940661  | 1.388916  |
| 112 | 1  | 0 | 8.639752   | 1.475750  | 2.321650  |

-----  
Total Energy (HF) = - 2303.4941111 Hartree

### Ferrocenyl pyrazabole 11c

Standard orientation:

| Center<br>Number | Atomic<br>Number | Atomic<br>Type | Coordinates (Angstroms) |           |           |
|------------------|------------------|----------------|-------------------------|-----------|-----------|
|                  |                  |                | X                       | Y         | Z         |
| 1                | 7                | 0              | 1.250365                | -0.062542 | -0.456152 |
| 2                | 7                | 0              | 1.254259                | -0.074304 | 0.902626  |

|    |   |   |           |           |           |
|----|---|---|-----------|-----------|-----------|
| 3  | 6 | 0 | 2.520754  | -0.219353 | 1.322237  |
| 4  | 1 | 0 | 2.753111  | -0.252140 | 2.374889  |
| 5  | 6 | 0 | 3.378108  | -0.306734 | 0.215048  |
| 6  | 6 | 0 | 2.514284  | -0.200628 | -0.885466 |
| 7  | 1 | 0 | 2.740159  | -0.220088 | -1.939869 |
| 8  | 6 | 0 | 0.126742  | 1.382614  | -2.360768 |
| 9  | 1 | 0 | 0.989775  | 1.226264  | -3.027173 |
| 10 | 1 | 0 | -0.737582 | 1.400757  | -3.043499 |
| 11 | 6 | 0 | -0.161546 | -1.280430 | -2.326911 |
| 12 | 1 | 0 | -1.030313 | -1.141309 | -2.989651 |
| 13 | 1 | 0 | 0.697791  | -1.316180 | -3.015186 |
| 14 | 6 | 0 | 0.260790  | 2.762449  | -1.701893 |
| 15 | 1 | 0 | 1.133347  | 2.773868  | -1.034051 |
| 16 | 1 | 0 | -0.609024 | 2.955060  | -1.058271 |
| 17 | 5 | 0 | -0.013293 | 0.062796  | -1.414475 |
| 18 | 6 | 0 | -0.289662 | -2.642411 | -1.630901 |
| 19 | 1 | 0 | -1.160018 | -2.638193 | -0.960007 |
| 20 | 1 | 0 | 0.582994  | -2.815419 | -0.985453 |
| 21 | 7 | 0 | -1.262840 | 0.205876  | 0.911773  |
| 22 | 7 | 0 | -1.267547 | 0.207894  | -0.447033 |
| 23 | 6 | 0 | -2.535300 | 0.339577  | -0.866984 |
| 24 | 1 | 0 | -2.768446 | 0.363396  | -1.919711 |
| 25 | 6 | 0 | -3.392930 | 0.427201  | 0.239974  |
| 26 | 6 | 0 | -2.527717 | 0.336744  | 1.340815  |
| 27 | 1 | 0 | -2.753425 | 0.359349  | 2.395195  |
| 28 | 6 | 0 | -0.144819 | -1.239767 | 2.817941  |
| 29 | 1 | 0 | -1.002886 | -1.075689 | 3.488857  |
| 30 | 1 | 0 | 0.722800  | -1.265068 | 3.496235  |
| 31 | 6 | 0 | 0.154812  | 1.421783  | 2.781255  |
| 32 | 1 | 0 | 1.018577  | 1.275736  | 3.449055  |
| 33 | 1 | 0 | -0.708140 | 1.465661  | 3.464548  |
| 34 | 6 | 0 | -0.294428 | -2.618766 | 2.160518  |
| 35 | 1 | 0 | -1.169454 | -2.622197 | 1.495695  |
| 36 | 1 | 0 | 0.571152  | -2.820667 | 1.514111  |
| 37 | 5 | 0 | 0.000819  | 0.078564  | 1.870089  |
| 38 | 6 | 0 | 0.298985  | 2.782010  | 2.085026  |
| 39 | 1 | 0 | 1.171847  | 2.768648  | 1.417421  |
| 40 | 1 | 0 | -0.569388 | 2.963775  | 1.436307  |
| 41 | 6 | 0 | 0.393945  | 3.914632  | -2.708604 |
| 42 | 1 | 0 | 1.266739  | 3.731693  | -3.350902 |
| 43 | 1 | 0 | -0.477426 | 3.909247  | -3.378266 |
| 44 | 6 | 0 | 0.441116  | 3.960394  | 3.059726  |
| 45 | 1 | 0 | -0.431554 | 3.981684  | 3.727327  |
| 46 | 1 | 0 | 1.310989  | 3.787289  | 3.708687  |
| 47 | 6 | 0 | 0.585283  | 5.317138  | 2.362878  |
| 48 | 1 | 0 | -0.285853 | 5.534431  | 1.734044  |
| 49 | 1 | 0 | 0.684314  | 6.133475  | 3.086472  |
| 50 | 1 | 0 | 1.469484  | 5.338041  | 1.715301  |
| 51 | 6 | 0 | 0.523837  | 5.291589  | -2.049618 |
| 52 | 1 | 0 | -0.350523 | 5.517716  | -1.428381 |
| 53 | 1 | 0 | 1.406640  | 5.339459  | -1.401637 |
| 54 | 1 | 0 | 0.615952  | 6.088363  | -2.795596 |

|     |    |   |            |           |           |
|-----|----|---|------------|-----------|-----------|
| 55  | 6  | 0 | -0.423159  | -3.821919 | -2.605421 |
| 56  | 1  | 0 | 0.446375   | -3.832993 | -3.277350 |
| 57  | 1  | 0 | -1.298172  | -3.658617 | -3.250006 |
| 58  | 6  | 0 | -0.435752  | -3.768768 | 3.168648  |
| 59  | 1  | 0 | -1.303751  | -3.575875 | 3.814510  |
| 60  | 1  | 0 | 0.438489   | -3.772392 | 3.834559  |
| 61  | 6  | 0 | -0.583477  | -5.144603 | 2.511078  |
| 62  | 1  | 0 | -0.680759  | -5.939962 | 3.257906  |
| 63  | 1  | 0 | -1.469834  | -5.183194 | 1.867299  |
| 64  | 1  | 0 | 0.285402   | -5.380471 | 1.885820  |
| 65  | 6  | 0 | -0.548270  | -5.180512 | -1.908474 |
| 66  | 1  | 0 | -0.642356  | -5.997538 | -2.631949 |
| 67  | 1  | 0 | 0.328953   | -5.388402 | -1.284912 |
| 68  | 1  | 0 | -1.428336  | -5.211615 | -1.255738 |
| 69  | 6  | 0 | -4.799770  | 0.564460  | 0.244170  |
| 70  | 6  | 0 | -6.010707  | 0.675388  | 0.246703  |
| 71  | 6  | 0 | 4.782725   | -0.465188 | 0.207913  |
| 72  | 6  | 0 | 5.990940   | -0.602380 | 0.199049  |
| 73  | 6  | 0 | -7.428930  | 0.796528  | 0.247212  |
| 74  | 6  | 0 | -8.149877  | 0.865737  | 1.455343  |
| 75  | 6  | 0 | -8.150874  | 0.846225  | -0.963465 |
| 76  | 6  | 0 | -9.535078  | 0.977883  | 1.448825  |
| 77  | 1  | 0 | -7.610587  | 0.838491  | 2.396793  |
| 78  | 6  | 0 | -9.534780  | 0.951807  | -0.959096 |
| 79  | 1  | 0 | -7.611556  | 0.792939  | -1.903850 |
| 80  | 6  | 0 | -10.260514 | 1.016155  | 0.245161  |
| 81  | 1  | 0 | -10.063806 | 1.053834  | 2.393856  |
| 82  | 1  | 0 | -10.067513 | 0.966705  | -1.904967 |
| 83  | 6  | 0 | 7.404950   | -0.764801 | 0.183532  |
| 84  | 6  | 0 | 8.121987   | -0.736524 | -1.030682 |
| 85  | 6  | 0 | 8.125827   | -0.961520 | 1.377602  |
| 86  | 6  | 0 | 9.500773   | -0.894605 | -1.042848 |
| 87  | 1  | 0 | 7.583044   | -0.583621 | -1.960282 |
| 88  | 6  | 0 | 9.505647   | -1.125537 | 1.353936  |
| 89  | 1  | 0 | 7.590073   | -0.994734 | 2.320883  |
| 90  | 6  | 0 | 10.226255  | -1.091376 | 0.147094  |
| 91  | 1  | 0 | 10.029929  | -0.849645 | -1.989648 |
| 92  | 1  | 0 | 10.032731  | -1.301680 | 2.286438  |
| 93  | 6  | 0 | 11.686715  | -1.284404 | 0.132677  |
| 94  | 26 | 0 | 13.150021  | 0.132259  | -0.350781 |
| 95  | 6  | 0 | 12.589059  | -1.089000 | 1.233567  |
| 96  | 6  | 0 | 12.481284  | -1.727660 | -0.980534 |
| 97  | 6  | 0 | 13.907698  | -1.420522 | 0.806484  |
| 98  | 6  | 0 | 13.840578  | -1.816555 | -0.562717 |
| 99  | 6  | 0 | 12.210466  | 1.931741  | -0.798441 |
| 100 | 6  | 0 | 12.966183  | 1.479734  | -1.922298 |
| 101 | 6  | 0 | 14.333707  | 1.377938  | -1.522868 |
| 102 | 6  | 0 | 14.422361  | 1.765956  | -0.151889 |
| 103 | 6  | 0 | 13.110065  | 2.108208  | 0.295719  |
| 104 | 1  | 0 | 12.320569  | -0.714046 | 2.211365  |
| 105 | 1  | 0 | 12.109902  | -1.958857 | -1.969110 |
| 106 | 1  | 0 | 14.805311  | -1.346791 | 1.404699  |

|     |    |   |            |           |           |
|-----|----|---|------------|-----------|-----------|
| 107 | 1  | 0 | 14.676956  | -2.105458 | -1.184187 |
| 108 | 1  | 0 | 11.138459  | 2.070832  | -0.768124 |
| 109 | 1  | 0 | 12.568927  | 1.231478  | -2.896988 |
| 110 | 1  | 0 | 15.152314  | 1.035166  | -2.140804 |
| 111 | 1  | 0 | 15.320187  | 1.768201  | 0.450885  |
| 112 | 1  | 0 | 12.840260  | 2.417007  | 1.296331  |
| 113 | 6  | 0 | -11.728298 | 1.142581  | 0.251236  |
| 114 | 26 | 0 | -13.121959 | -0.286044 | -0.377816 |
| 115 | 6  | 0 | -12.614493 | 0.789759  | 1.325673  |
| 116 | 6  | 0 | -12.548871 | 1.659736  | -0.809948 |
| 117 | 6  | 0 | -13.950128 | 1.097034  | 0.934495  |
| 118 | 6  | 0 | -13.909054 | 1.636902  | -0.385860 |
| 119 | 6  | 0 | -12.097073 | -1.975679 | -1.023594 |
| 120 | 6  | 0 | -12.894922 | -1.449870 | -2.084677 |
| 121 | 6  | 0 | -14.258779 | -1.464644 | -1.660461 |
| 122 | 6  | 0 | -14.302801 | -1.997556 | -0.336651 |
| 123 | 6  | 0 | -12.966723 | -2.313454 | 0.056675  |
| 124 | 1  | 0 | -12.322820 | 0.328001  | 2.258615  |
| 125 | 1  | 0 | -12.193925 | 2.013952  | -1.767564 |
| 126 | 1  | 0 | -14.840403 | 0.914648  | 1.520331  |
| 127 | 1  | 0 | -14.761596 | 1.945505  | -0.975020 |
| 128 | 1  | 0 | -11.018818 | -2.058152 | -1.020006 |
| 129 | 1  | 0 | -12.528605 | -1.079463 | -3.032276 |
| 130 | 1  | 0 | -15.105283 | -1.104802 | -2.229050 |
| 131 | 1  | 0 | -15.188442 | -2.111380 | 0.273217  |
| 132 | 1  | 0 | -12.662723 | -2.709280 | 1.015943  |

-----  
Total Energy (HF) = - 2765.6134873 Hartree

### Ferrocenyl pyrazabole 11d

Standard orientation:

| Center<br>Number | Atomic<br>Number | Atomic<br>Type | Coordinates (Angstroms) |           |           |
|------------------|------------------|----------------|-------------------------|-----------|-----------|
|                  |                  |                | X                       | Y         | Z         |
| 1                | 7                | 0              | -1.250312               | 1.447718  | -0.555525 |
| 2                | 7                | 0              | -1.236101               | 1.669170  | 0.785027  |
| 3                | 6                | 0              | -2.504856               | 1.739545  | 1.216623  |
| 4                | 1                | 0              | -2.725192               | 1.915650  | 2.257627  |
| 5                | 6                | 0              | -3.381381               | 1.559473  | 0.137110  |
| 6                | 6                | 0              | -2.528023               | 1.378315  | -0.960571 |
| 7                | 1                | 0              | -2.769871               | 1.203197  | -1.996981 |
| 8                | 6                | 0              | 0.004078                | -0.236760 | -2.156978 |
| 9                | 1                | 0              | -0.872326               | -0.314975 | -2.819705 |
| 10               | 1                | 0              | 0.865132                | -0.309567 | -2.840100 |
| 11               | 6                | 0              | -0.008210               | 2.388320  | -2.690083 |

|    |   |   |           |           |           |
|----|---|---|-----------|-----------|-----------|
| 12 | 1 | 0 | 0.854813  | 2.198091  | -3.347616 |
| 13 | 1 | 0 | -0.880578 | 2.190777  | -3.332952 |
| 14 | 6 | 0 | 0.018678  | -1.450838 | -1.218173 |
| 15 | 1 | 0 | -0.849765 | -1.413169 | -0.545612 |
| 16 | 1 | 0 | 0.901971  | -1.407663 | -0.565510 |
| 17 | 5 | 0 | 0.006636  | 1.260829  | -1.512722 |
| 18 | 6 | 0 | -0.011145 | 3.873645  | -2.302525 |
| 19 | 1 | 0 | 0.868012  | 4.100107  | -1.683364 |
| 20 | 1 | 0 | -0.883481 | 4.093636  | -1.671419 |
| 21 | 7 | 0 | 1.297095  | 1.669896  | 0.759689  |
| 22 | 7 | 0 | 1.282666  | 1.454801  | -0.581908 |
| 23 | 6 | 0 | 2.551248  | 1.393235  | -1.015167 |
| 24 | 1 | 0 | 2.771313  | 1.223258  | -2.057251 |
| 25 | 6 | 0 | 3.428011  | 1.573003  | 0.064258  |
| 26 | 6 | 0 | 2.574880  | 1.743939  | 1.163791  |
| 27 | 1 | 0 | 2.816910  | 1.917578  | 2.200404  |
| 28 | 6 | 0 | 0.046109  | 3.355308  | 2.361991  |
| 29 | 1 | 0 | 0.921097  | 3.430298  | 3.026943  |
| 30 | 1 | 0 | -0.816347 | 3.430807  | 3.043060  |
| 31 | 6 | 0 | 0.051660  | 0.729853  | 2.893301  |
| 32 | 1 | 0 | -0.808932 | 0.924438  | 3.552736  |
| 33 | 1 | 0 | 0.926550  | 0.922488  | 3.534258  |
| 34 | 6 | 0 | 0.037892  | 4.569730  | 1.423495  |
| 35 | 1 | 0 | 0.908176  | 4.529596  | 0.753427  |
| 36 | 1 | 0 | -0.843641 | 4.529543  | 0.768333  |
| 37 | 5 | 0 | 0.040049  | 1.858110  | 1.716709  |
| 38 | 6 | 0 | 0.045806  | -0.755300 | 2.505259  |
| 39 | 1 | 0 | -0.836452 | -0.977030 | 1.888744  |
| 40 | 1 | 0 | 0.914980  | -0.979569 | 1.871348  |
| 41 | 6 | 0 | 0.014615  | -2.798659 | -1.954261 |
| 42 | 1 | 0 | -0.868836 | -2.849622 | -2.605939 |
| 43 | 1 | 0 | 0.884288  | -2.844803 | -2.624528 |
| 44 | 6 | 0 | 0.056485  | -1.705185 | 3.712125  |
| 45 | 1 | 0 | 0.940088  | -1.491319 | 4.329542  |
| 46 | 1 | 0 | -0.813110 | -1.487819 | 4.347907  |
| 47 | 6 | 0 | 0.049477  | -3.187544 | 3.325246  |
| 48 | 1 | 0 | 0.925047  | -3.442831 | 2.717144  |
| 49 | 1 | 0 | 0.058727  | -3.834983 | 4.208758  |
| 50 | 1 | 0 | -0.840992 | -3.439880 | 2.737910  |
| 51 | 6 | 0 | 0.027798  | -4.009383 | -1.015593 |
| 52 | 1 | 0 | 0.917716  | -4.005273 | -0.375551 |
| 53 | 1 | 0 | -0.848455 | -4.009992 | -0.356968 |
| 54 | 1 | 0 | 0.024522  | -4.951993 | -1.573483 |
| 55 | 6 | 0 | -0.023171 | 4.823083  | -3.509722 |
| 56 | 1 | 0 | -0.903052 | 4.603517  | -4.130442 |
| 57 | 1 | 0 | 0.850249  | 4.611013  | -4.142051 |
| 58 | 6 | 0 | 0.044148  | 5.917334  | 2.159954  |
| 59 | 1 | 0 | 0.925923  | 5.965367  | 2.814116  |
| 60 | 1 | 0 | -0.827319 | 5.965989  | 2.827742  |
| 61 | 6 | 0 | 0.037348  | 7.128236  | 1.221448  |
| 62 | 1 | 0 | 0.041605  | 8.070742  | 1.779522  |
| 63 | 1 | 0 | 0.915730  | 7.126492  | 0.565685  |



|     |    |   |            |           |           |
|-----|----|---|------------|-----------|-----------|
| 64  | 1  | 0 | -0.850533  | 7.126734  | 0.578611  |
| 65  | 6  | 0 | -0.027068  | 6.305538  | -3.123188 |
| 66  | 1  | 0 | -0.036381  | 6.952637  | -4.006938 |
| 67  | 1  | 0 | -0.907084  | 6.555457  | -2.519290 |
| 68  | 1  | 0 | 0.859108   | 6.563588  | -2.531891 |
| 69  | 6  | 0 | 4.844633   | 1.583802  | 0.043309  |
| 70  | 6  | 0 | 6.059388   | 1.594249  | 0.016495  |
| 71  | 6  | 0 | -4.798182  | 1.564328  | 0.154381  |
| 72  | 6  | 0 | -6.013024  | 1.572175  | 0.176449  |
| 73  | 6  | 0 | 7.488258   | 1.613965  | -0.026227 |
| 74  | 6  | 0 | 8.171705   | 2.757964  | -0.484171 |
| 75  | 6  | 0 | 8.225645   | 0.486229  | 0.372025  |
| 76  | 6  | 0 | 9.562208   | 2.756787  | -0.530775 |
| 77  | 1  | 0 | 7.604842   | 3.629318  | -0.794568 |
| 78  | 6  | 0 | 9.627031   | 0.477449  | 0.324902  |
| 79  | 1  | 0 | 7.691257   | -0.398313 | 0.701780  |
| 80  | 6  | 0 | 10.284914  | 1.633464  | -0.127474 |
| 81  | 1  | 0 | 10.090642  | 3.640647  | -0.876270 |
| 82  | 6  | 0 | -7.442331  | 1.591866  | 0.207644  |
| 83  | 6  | 0 | -8.160542  | 0.423797  | 0.513686  |
| 84  | 6  | 0 | -8.145344  | 2.780806  | -0.070113 |
| 85  | 6  | 0 | -9.562281  | 0.419178  | 0.557793  |
| 86  | 1  | 0 | -7.610169  | -0.491275 | 0.704456  |
| 87  | 6  | 0 | -9.536097  | 2.783250  | -0.028966 |
| 88  | 1  | 0 | -7.593471  | 3.683658  | -0.309256 |
| 89  | 6  | 0 | -10.239125 | 1.620368  | 0.286882  |
| 90  | 1  | 0 | -10.079782 | 3.700837  | -0.234548 |
| 91  | 1  | 0 | -11.322874 | 1.647367  | 0.341581  |
| 92  | 1  | 0 | 11.370090  | 1.656924  | -0.146419 |
| 93  | 6  | 0 | -10.310071 | -0.804916 | 0.906274  |
| 94  | 26 | 0 | -10.450096 | -2.572762 | -0.202988 |
| 95  | 6  | 0 | -9.818698  | -1.922654 | 1.663730  |
| 96  | 6  | 0 | -11.678879 | -1.093052 | 0.580982  |
| 97  | 6  | 0 | -10.872067 | -2.871578 | 1.809114  |
| 98  | 6  | 0 | -12.022647 | -2.359188 | 1.138422  |
| 99  | 6  | 0 | -9.331447  | -2.357028 | -1.941607 |
| 100 | 6  | 0 | -10.698901 | -2.606491 | -2.266623 |
| 101 | 6  | 0 | -11.061656 | -3.870206 | -1.708562 |
| 102 | 6  | 0 | -9.918039  | -4.401700 | -1.039183 |
| 103 | 6  | 0 | -8.848905  | -3.465670 | -1.182309 |
| 104 | 1  | 0 | -8.818368  | -2.025051 | 2.060671  |
| 105 | 1  | 0 | -12.328236 | -0.474196 | -0.022515 |
| 106 | 1  | 0 | -10.800187 | -3.825351 | 2.313285  |
| 107 | 1  | 0 | -12.975700 | -2.859605 | 1.036581  |
| 108 | 1  | 0 | -8.772424  | -1.464288 | -2.186551 |
| 109 | 1  | 0 | -11.353634 | -1.940654 | -2.811880 |
| 110 | 1  | 0 | -12.039570 | -4.329358 | -1.757075 |
| 111 | 1  | 0 | -9.878571  | -5.333115 | -0.491295 |
| 112 | 1  | 0 | -7.856100  | -3.567113 | -0.765947 |
| 113 | 6  | 0 | 10.398373  | -0.704438 | 0.757729  |
| 114 | 26 | 0 | 10.377454  | -2.617145 | -0.088749 |
| 115 | 6  | 0 | 11.712370  | -1.074519 | 0.313161  |

|     |   |   |           |           |           |
|-----|---|---|-----------|-----------|-----------|
| 116 | 6 | 0 | 9.993259  | -1.686689 | 1.724846  |
| 117 | 6 | 0 | 12.109866 | -2.256997 | 1.002953  |
| 118 | 6 | 0 | 11.047084 | -2.634365 | 1.877413  |
| 119 | 6 | 0 | 9.038650  | -2.621828 | -1.676722 |
| 120 | 6 | 0 | 8.656884  | -3.602103 | -0.711290 |
| 121 | 6 | 0 | 9.731702  | -4.533169 | -0.578344 |
| 122 | 6 | 0 | 10.777678 | -4.127755 | -1.461464 |
| 123 | 6 | 0 | 10.349078 | -2.946711 | -2.140767 |
| 124 | 1 | 0 | 12.285300 | -0.566549 | -0.450214 |
| 125 | 1 | 0 | 9.048706  | -1.700519 | 2.250833  |
| 126 | 1 | 0 | 13.037264 | -2.793943 | 0.859033  |
| 127 | 1 | 0 | 11.030095 | -3.502032 | 2.522453  |
| 128 | 1 | 0 | 8.457377  | -1.758029 | -1.968654 |
| 129 | 1 | 0 | 7.728315  | -3.620971 | -0.157435 |
| 130 | 1 | 0 | 9.761807  | -5.376609 | 0.097773  |
| 131 | 1 | 0 | 11.738386 | -4.611623 | -1.572496 |
| 132 | 1 | 0 | 10.928015 | -2.379943 | -2.856895 |

-----

Total Energy (HF) = - 2765.610203 Hartree

### Ferrocenyl pyrazabole 11e

Standard orientation:

-----

| Center<br>Number | Atomic<br>Number | Atomic<br>Type | Coordinates (Angstroms) |           |           |
|------------------|------------------|----------------|-------------------------|-----------|-----------|
|                  |                  |                | X                       | Y         | Z         |
| 1                | 7                | 0              | -1.266918               | 0.185597  | -0.544409 |
| 2                | 7                | 0              | -1.270371               | 0.189644  | 0.814631  |
| 3                | 6                | 0              | -2.539918               | 0.296831  | 1.235713  |
| 4                | 1                | 0              | -2.772529               | 0.319188  | 2.288625  |
| 5                | 6                | 0              | -3.399865               | 0.366563  | 0.129105  |
| 6                | 6                | 0              | -2.534106               | 0.290737  | -0.972566 |
| 7                | 1                | 0              | -2.761407               | 0.307034  | -2.026743 |
| 8                | 6                | 0              | -0.120102               | -1.250342 | -2.441204 |
| 9                | 1                | 0              | -0.982240               | -1.111025 | -3.112455 |
| 10               | 1                | 0              | 0.747184                | -1.261950 | -3.120315 |
| 11               | 6                | 0              | 0.120230                | 1.417836  | -2.425703 |
| 12               | 1                | 0              | 0.986570                | 1.286608  | -3.093176 |
| 13               | 1                | 0              | -0.743795               | 1.436550  | -3.108791 |
| 14               | 6                | 0              | -0.238156               | -2.626803 | -1.772139 |
| 15               | 1                | 0              | -1.115231               | -2.645923 | -1.110252 |
| 16               | 1                | 0              | 0.629702                | -2.801198 | -1.120824 |
| 17               | 5                | 0              | -0.002439               | 0.078471  | -1.504423 |
| 18               | 6                | 0              | 0.233306                | 2.786531  | -1.740254 |
| 19               | 1                | 0              | 1.108571                | 2.800047  | -1.075795 |
| 20               | 1                | 0              | -0.636907               | 2.951334  | -1.089527 |
| 21               | 7                | 0              | 1.254638                | -0.016437 | 0.820939  |

-----

|    |   |   |           |           |           |
|----|---|---|-----------|-----------|-----------|
| 22 | 7 | 0 | 1.255920  | -0.039399 | -0.537935 |
| 23 | 6 | 0 | 2.524040  | -0.159203 | -0.959372 |
| 24 | 1 | 0 | 2.755093  | -0.195384 | -2.012218 |
| 25 | 6 | 0 | 3.385509  | -0.218227 | 0.146644  |
| 26 | 6 | 0 | 2.522136  | -0.121992 | 1.248593  |
| 27 | 1 | 0 | 2.750688  | -0.128164 | 2.302625  |
| 28 | 6 | 0 | 0.095826  | 1.413452  | 2.716606  |
| 29 | 1 | 0 | 0.966444  | 1.288557  | 3.379697  |
| 30 | 1 | 0 | -0.765214 | 1.411177  | 3.403707  |
| 31 | 6 | 0 | -0.122004 | -1.257120 | 2.702797  |
| 32 | 1 | 0 | -0.996558 | -1.139644 | 3.362031  |
| 33 | 1 | 0 | 0.735758  | -1.261639 | 3.393944  |
| 34 | 6 | 0 | 0.184539  | 2.791134  | 2.045658  |
| 35 | 1 | 0 | 1.057369  | 2.826047  | 1.378993  |
| 36 | 1 | 0 | -0.690137 | 2.947628  | 1.398779  |
| 37 | 5 | 0 | -0.010654 | 0.083024  | 1.781155  |
| 38 | 6 | 0 | -0.206060 | -2.627525 | 2.016565  |
| 39 | 1 | 0 | -1.077097 | -2.657199 | 1.347237  |
| 40 | 1 | 0 | 0.670821  | -2.775191 | 1.370526  |
| 41 | 6 | 0 | -0.347350 | -3.789083 | -2.769991 |
| 42 | 1 | 0 | -1.215938 | -3.622676 | -3.422413 |
| 43 | 1 | 0 | 0.530436  | -3.778829 | -3.431166 |
| 44 | 6 | 0 | -0.298028 | -3.804254 | 2.999004  |
| 45 | 1 | 0 | 0.572561  | -3.781688 | 3.669302  |
| 46 | 1 | 0 | -1.176884 | -3.666524 | 3.644333  |
| 47 | 6 | 0 | -0.378384 | -5.170986 | 2.311443  |
| 48 | 1 | 0 | 0.503901  | -5.353148 | 1.686965  |
| 49 | 1 | 0 | -0.442480 | -5.985624 | 3.040837  |
| 50 | 1 | 0 | -1.258562 | -5.236969 | 1.661514  |
| 51 | 6 | 0 | -0.467029 | -5.161744 | -2.100222 |
| 52 | 1 | 0 | 0.402730  | -5.371201 | -1.466853 |
| 53 | 1 | 0 | -1.356828 | -5.215395 | -1.462302 |
| 54 | 1 | 0 | -0.540247 | -5.966031 | -2.840168 |
| 55 | 6 | 0 | 0.342510  | 3.960732  | -2.724077 |
| 56 | 1 | 0 | -0.533529 | 3.956180  | -3.387600 |
| 57 | 1 | 0 | 1.213216  | 3.804021  | -3.376073 |
| 58 | 6 | 0 | 0.276360  | 3.956728  | 3.041260  |
| 59 | 1 | 0 | 1.153055  | 3.809826  | 3.687516  |
| 60 | 1 | 0 | -0.596139 | 3.928837  | 3.708903  |
| 61 | 6 | 0 | 0.361782  | 5.330796  | 2.369114  |
| 62 | 1 | 0 | 0.424489  | 6.137242  | 3.107678  |
| 63 | 1 | 0 | 1.244566  | 5.402401  | 1.723335  |
| 64 | 1 | 0 | -0.517763 | 5.521375  | 1.743286  |
| 65 | 6 | 0 | 0.457247  | 5.325701  | -2.037923 |
| 66 | 1 | 0 | 0.531525  | 6.138697  | -2.768181 |
| 67 | 1 | 0 | -0.415095 | 5.526189  | -1.405203 |
| 68 | 1 | 0 | 1.344727  | 5.373502  | -1.396310 |
| 69 | 6 | 0 | 4.792716  | -0.348063 | 0.148451  |
| 70 | 6 | 0 | 6.003449  | -0.462760 | 0.147296  |
| 71 | 6 | 0 | -4.808206 | 0.482855  | 0.122715  |
| 72 | 6 | 0 | -6.020376 | 0.580804  | 0.112683  |
| 73 | 6 | 0 | 7.419309  | -0.600557 | 0.143865  |

|     |    |   |            |           |           |
|-----|----|---|------------|-----------|-----------|
| 74  | 6  | 0 | 8.155127   | -0.522954 | 1.345051  |
| 75  | 6  | 0 | 8.119070   | -0.820279 | -1.061315 |
| 76  | 6  | 0 | 9.535368   | -0.659965 | 1.340958  |
| 77  | 1  | 0 | 7.628144   | -0.354535 | 2.278582  |
| 78  | 6  | 0 | 9.499259   | -0.957537 | -1.064902 |
| 79  | 1  | 0 | 7.563873   | -0.882636 | -1.991609 |
| 80  | 6  | 0 | 10.236504  | -0.880339 | 0.136082  |
| 81  | 1  | 0 | 10.090567  | -0.599660 | 2.271354  |
| 82  | 1  | 0 | 10.026261  | -1.127610 | -1.998113 |
| 83  | 6  | 0 | -7.438424  | 0.691853  | 0.094376  |
| 84  | 6  | 0 | -8.136749  | 0.787298  | -1.127822 |
| 85  | 6  | 0 | -8.178455  | 0.706399  | 1.295371  |
| 86  | 6  | 0 | -9.519601  | 0.890698  | -1.147935 |
| 87  | 1  | 0 | -7.578399  | 0.778490  | -2.058270 |
| 88  | 6  | 0 | -9.561598  | 0.809692  | 1.274787  |
| 89  | 1  | 0 | -7.652590  | 0.634651  | 2.241890  |
| 90  | 6  | 0 | -10.261440 | 0.902511  | 0.052775  |
| 91  | 1  | 0 | -10.045701 | 0.963491  | -2.094219 |
| 92  | 1  | 0 | -10.119926 | 0.819605  | 2.205223  |
| 93  | 6  | 0 | 11.651657  | -1.021486 | 0.132636  |
| 94  | 6  | 0 | 12.861695  | -1.151261 | 0.132673  |
| 95  | 6  | 0 | 14.269085  | -1.316900 | 0.138510  |
| 96  | 26 | 0 | 15.705405  | 0.147760  | -0.231933 |
| 97  | 6  | 0 | 15.143116  | -1.165945 | 1.274562  |
| 98  | 6  | 0 | 15.093058  | -1.687260 | -0.984564 |
| 99  | 6  | 0 | 16.471781  | -1.454794 | 0.854803  |
| 100 | 6  | 0 | 16.440845  | -1.776288 | -0.536650 |
| 101 | 6  | 0 | 14.730751  | 1.937967  | -0.633672 |
| 102 | 6  | 0 | 15.543361  | 1.561887  | -1.745326 |
| 103 | 6  | 0 | 16.896505  | 1.480017  | -1.295195 |
| 104 | 6  | 0 | 16.919223  | 1.804876  | 0.094753  |
| 105 | 6  | 0 | 15.580043  | 2.087104  | 0.503938  |
| 106 | 1  | 0 | 14.828386  | -0.870709 | 2.265348  |
| 107 | 1  | 0 | 14.734650  | -1.853581 | -1.990445 |
| 108 | 1  | 0 | 17.355996  | -1.404528 | 1.475048  |
| 109 | 1  | 0 | 17.297351  | -2.013499 | -1.152482 |
| 110 | 1  | 0 | 13.653834  | 2.036452  | -0.638844 |
| 111 | 1  | 0 | 15.191544  | 1.345155  | -2.744564 |
| 112 | 1  | 0 | 17.748896  | 1.189948  | -1.894165 |
| 113 | 1  | 0 | 17.792278  | 1.804388  | 0.732923  |
| 114 | 1  | 0 | 15.260908  | 2.339732  | 1.505695  |
| 115 | 6  | 0 | -11.679884 | 1.002034  | 0.028736  |
| 116 | 6  | 0 | -12.893393 | 1.089769  | 0.001139  |
| 117 | 6  | 0 | -14.305538 | 1.203278  | -0.036408 |
| 118 | 26 | 0 | -15.676073 | -0.357586 | -0.207534 |
| 119 | 6  | 0 | -15.198757 | 1.187839  | 1.094611  |
| 120 | 6  | 0 | -15.117073 | 1.368612  | -1.216129 |
| 121 | 6  | 0 | -16.527449 | 1.356100  | 0.613607  |
| 122 | 6  | 0 | -16.477217 | 1.467675  | -0.809605 |
| 123 | 6  | 0 | -14.626734 | -2.148737 | -0.282386 |
| 124 | 6  | 0 | -15.393387 | -1.979763 | -1.474717 |
| 125 | 6  | 0 | -16.769513 | -1.882589 | -1.104339 |

|     |   |   |            |           |           |
|-----|---|---|------------|-----------|-----------|
| 126 | 6 | 0 | -16.852438 | -1.990787 | 0.316675  |
| 127 | 6 | 0 | -15.527652 | -2.154622 | 0.824845  |
| 128 | 1 | 0 | -14.896731 | 1.055937  | 2.123840  |
| 129 | 1 | 0 | -14.741433 | 1.397219  | -2.228997 |
| 130 | 1 | 0 | -17.423107 | 1.363190  | 1.219351  |
| 131 | 1 | 0 | -17.328117 | 1.573147  | -1.468226 |
| 132 | 1 | 0 | -13.548331 | -2.204512 | -0.223923 |
| 133 | 1 | 0 | -14.998150 | -1.906110 | -2.478443 |
| 134 | 1 | 0 | -17.599412 | -1.721337 | -1.778621 |
| 135 | 1 | 0 | -17.756402 | -1.927351 | 0.906913  |
| 136 | 1 | 0 | -15.252401 | -2.237053 | 1.867285  |

-----  
Total Energy (HF) = - 2917.9212204 Hartree

### Ferrocenyl pyrazabole 11f

Standard orientation:

| Center<br>Number | Atomic<br>Number | Atomic<br>Type | Coordinates (Angstroms) |           |           |
|------------------|------------------|----------------|-------------------------|-----------|-----------|
|                  |                  |                | X                       | Y         | Z         |
| 1                | 7                | 0              | -1.265390               | 0.070140  | 0.960540  |
| 2                | 7                | 0              | -1.264777               | 0.069945  | -0.398606 |
| 3                | 6                | 0              | -2.535263               | 0.140395  | -0.823894 |
| 4                | 1                | 0              | -2.765319               | 0.153350  | -1.877552 |
| 5                | 6                | 0              | -3.400327               | 0.189583  | 0.279900  |
| 6                | 6                | 0              | -2.536408               | 0.140723  | 1.384615  |
| 7                | 1                | 0              | -2.767374               | 0.154297  | 2.438072  |
| 8                | 6                | 0              | 0.071149                | 1.340297  | 2.852141  |
| 9                | 1                | 0              | -0.792201               | 1.321630  | 3.536080  |
| 10               | 1                | 0              | 0.942247                | 1.240711  | 3.518852  |
| 11               | 6                | 0              | -0.072696               | -1.335579 | 2.852961  |
| 12               | 1                | 0              | 0.790180                | -1.316450 | 3.537484  |
| 13               | 1                | 0              | -0.944298               | -1.235603 | 3.518952  |
| 14               | 6                | 0              | 0.128697                | 2.715352  | 2.172441  |
| 15               | 1                | 0              | -0.745491               | 2.844675  | 1.519004  |
| 16               | 1                | 0              | 1.004637                | 2.768232  | 1.510900  |
| 17               | 5                | 0              | -0.000458               | 0.002080  | 1.924401  |
| 18               | 6                | 0              | -0.129669               | -2.711056 | 2.174072  |
| 19               | 1                | 0              | 0.745125                | -2.840799 | 1.521524  |
| 20               | 1                | 0              | -1.005007               | -2.764379 | 1.511773  |
| 21               | 7                | 0              | 1.265117                | -0.069008 | -0.397758 |
| 22               | 7                | 0              | 1.265049                | -0.066639 | 0.961386  |
| 23               | 6                | 0              | 2.535860                | -0.136501 | 1.386245  |
| 24               | 1                | 0              | 2.766266                | -0.148105 | 2.439849  |
| 25               | 6                | 0              | 3.400316                | -0.187553 | 0.282055  |
| 26               | 6                | 0              | 2.535793                | -0.140498 | -0.822261 |
| 27               | 1                | 0              | 2.766408                | -0.155430 | -1.875769 |
| 28               | 6                | 0              | -0.072389               | -1.337910 | -2.289441 |

|    |   |   |           |           |           |
|----|---|---|-----------|-----------|-----------|
| 29 | 1 | 0 | 0.791566  | -1.320604 | -2.972653 |
| 30 | 1 | 0 | -0.942759 | -1.236878 | -2.956882 |
| 31 | 6 | 0 | 0.073947  | 1.337788  | -2.290158 |
| 32 | 1 | 0 | -0.789473 | 1.319998  | -2.974037 |
| 33 | 1 | 0 | 0.944878  | 1.236435  | -2.956820 |
| 34 | 6 | 0 | -0.132778 | -2.712916 | -1.609891 |
| 35 | 1 | 0 | 0.740706  | -2.843846 | -0.955848 |
| 36 | 1 | 0 | -1.009285 | -2.764343 | -0.948975 |
| 37 | 5 | 0 | 0.000462  | 0.000191  | -1.361560 |
| 38 | 6 | 0 | 0.133623  | 2.713205  | -1.611386 |
| 39 | 1 | 0 | -0.740551 | 2.844507  | -0.958333 |
| 40 | 1 | 0 | 1.009445  | 2.765096  | -0.949602 |
| 41 | 6 | 0 | 0.184413  | 3.889887  | 3.160015  |
| 42 | 1 | 0 | -0.692326 | 3.845706  | 3.821221  |
| 43 | 1 | 0 | 1.059358  | 3.769270  | 3.814057  |
| 44 | 6 | 0 | 0.191701  | 3.886919  | -2.599812 |
| 45 | 1 | 0 | 1.066511  | 3.764142  | -3.253631 |
| 46 | 1 | 0 | -0.685025 | 3.843903  | -3.261112 |
| 47 | 6 | 0 | 0.251481  | 5.258213  | -1.919291 |
| 48 | 1 | 0 | 1.137770  | 5.345724  | -1.280291 |
| 49 | 1 | 0 | 0.290020  | 6.070469  | -2.653118 |
| 50 | 1 | 0 | -0.626899 | 5.425022  | -1.285146 |
| 51 | 6 | 0 | 0.241665  | 5.260789  | 2.478483  |
| 52 | 1 | 0 | 1.127668  | 5.349394  | 1.839242  |
| 53 | 1 | 0 | -0.637137 | 5.425595  | 1.844394  |
| 54 | 1 | 0 | 0.278896  | 6.073645  | 3.211713  |
| 55 | 6 | 0 | -0.186284 | -3.884964 | 3.162343  |
| 56 | 1 | 0 | -1.061877 | -3.763959 | 3.815447  |
| 57 | 1 | 0 | 0.689803  | -3.840322 | 3.824380  |
| 58 | 6 | 0 | -0.189885 | -3.887248 | -2.597639 |
| 59 | 1 | 0 | 0.687567  | -3.844719 | -3.258008 |
| 60 | 1 | 0 | -1.063970 | -3.764829 | -3.252495 |
| 61 | 6 | 0 | -0.250514 | -5.258100 | -1.916300 |
| 62 | 1 | 0 | -0.288463 | -6.070821 | -2.649643 |
| 63 | 1 | 0 | 0.627221  | -5.424635 | -1.281193 |
| 64 | 1 | 0 | -1.137439 | -5.345062 | -1.278107 |
| 65 | 6 | 0 | -0.242809 | -5.256309 | 2.481644  |
| 66 | 1 | 0 | -0.280575 | -6.068697 | 3.215365  |
| 67 | 1 | 0 | -1.128249 | -5.345435 | 1.841697  |
| 68 | 1 | 0 | 0.636561  | -5.421420 | 1.848420  |
| 69 | 6 | 0 | 4.810966  | -0.269597 | 0.280276  |
| 70 | 6 | 0 | 6.024991  | -0.341917 | 0.275326  |
| 71 | 6 | 0 | -4.810988 | 0.271424  | 0.277485  |
| 72 | 6 | 0 | -6.025023 | 0.343555  | 0.272288  |
| 73 | 6 | 0 | 7.444694  | -0.427340 | 0.265267  |
| 74 | 6 | 0 | 8.153429  | -0.489682 | -0.953264 |
| 75 | 6 | 0 | 8.175417  | -0.451558 | 1.472019  |
| 76 | 6 | 0 | 9.537616  | -0.572679 | -0.964271 |
| 77 | 1 | 0 | 7.601881  | -0.472039 | -1.887599 |
| 78 | 6 | 0 | 9.559783  | -0.534328 | 1.460487  |
| 79 | 1 | 0 | 7.641032  | -0.404292 | 2.415259  |
| 80 | 6 | 0 | 10.269926 | -0.596231 | 0.242230  |

|     |    |   |            |           |           |
|-----|----|---|------------|-----------|-----------|
| 81  | 1  | 0 | 10.072353  | -0.620019 | -1.907241 |
| 82  | 1  | 0 | 10.111539  | -0.551957 | 2.394638  |
| 83  | 6  | 0 | -7.444746  | 0.428653  | 0.262365  |
| 84  | 6  | 0 | -8.175259  | 0.453342  | 1.469237  |
| 85  | 6  | 0 | -8.153713  | 0.490202  | -0.956069 |
| 86  | 6  | 0 | -9.559639  | 0.535787  | 1.457917  |
| 87  | 1  | 0 | -7.640688  | 0.406658  | 2.412401  |
| 88  | 6  | 0 | -9.537927  | 0.572877  | -0.966864 |
| 89  | 1  | 0 | -7.602340  | 0.472178  | -1.890499 |
| 90  | 6  | 0 | -10.270022 | 0.596895  | 0.239758  |
| 91  | 1  | 0 | -10.111235 | 0.553763  | 2.392157  |
| 92  | 1  | 0 | -10.072841 | 0.619574  | -1.909766 |
| 93  | 6  | 0 | -11.688827 | 0.678982  | 0.226977  |
| 94  | 6  | 0 | -12.904470 | 0.746612  | 0.213070  |
| 95  | 6  | 0 | -14.324417 | 0.820885  | 0.192553  |
| 96  | 6  | 0 | -15.069283 | 0.815018  | 1.388785  |
| 97  | 6  | 0 | -15.027226 | 0.901464  | -1.028276 |
| 98  | 6  | 0 | -16.456677 | 0.884096  | 1.361052  |
| 99  | 1  | 0 | -14.545595 | 0.763522  | 2.337999  |
| 100 | 6  | 0 | -16.413305 | 0.964508  | -1.045690 |
| 101 | 1  | 0 | -14.469619 | 0.907507  | -1.959439 |
| 102 | 6  | 0 | -17.162136 | 0.952674  | 0.146394  |
| 103 | 1  | 0 | -17.003726 | 0.901641  | 2.298490  |
| 104 | 1  | 0 | -16.928377 | 1.008260  | -2.000258 |
| 105 | 6  | 0 | -18.632901 | 1.033221  | 0.130220  |
| 106 | 26 | 0 | -19.972034 | -0.425253 | -0.546951 |
| 107 | 6  | 0 | -19.524991 | 0.633886  | 1.183443  |
| 108 | 6  | 0 | -19.452405 | 1.544281  | -0.934916 |
| 109 | 6  | 0 | -20.862920 | 0.907931  | 0.776305  |
| 110 | 6  | 0 | -20.817656 | 1.472636  | -0.533450 |
| 111 | 6  | 0 | -18.886373 | -2.074162 | -1.199702 |
| 112 | 6  | 0 | -19.675936 | -1.551910 | -2.268658 |
| 113 | 6  | 0 | -21.047451 | -1.611976 | -1.874659 |
| 114 | 6  | 0 | -21.104708 | -2.169611 | -0.561730 |
| 115 | 6  | 0 | -19.769057 | -2.455284 | -0.144712 |
| 116 | 1  | 0 | -19.234575 | 0.165123  | 2.113222  |
| 117 | 1  | 0 | -19.094305 | 1.926847  | -1.880293 |
| 118 | 1  | 0 | -21.756170 | 0.688057  | 1.344629  |
| 119 | 1  | 0 | -21.669881 | 1.765909  | -1.130885 |
| 120 | 1  | 0 | -17.806549 | -2.127080 | -1.174498 |
| 121 | 1  | 0 | -19.300138 | -1.155377 | -3.201868 |
| 122 | 1  | 0 | -21.891395 | -1.265833 | -2.455492 |
| 123 | 1  | 0 | -21.999992 | -2.320599 | 0.025677  |
| 124 | 1  | 0 | -19.474750 | -2.860108 | 0.813801  |
| 125 | 6  | 0 | 11.688709  | -0.678666 | 0.229184  |
| 126 | 6  | 0 | 12.904334  | -0.746539 | 0.214915  |
| 127 | 6  | 0 | 14.324252  | -0.821236 | 0.193841  |
| 128 | 6  | 0 | 15.069541  | -0.816123 | 1.389815  |
| 129 | 6  | 0 | 15.026593  | -0.901503 | -1.027278 |
| 130 | 6  | 0 | 16.456905  | -0.885724 | 1.361572  |
| 131 | 1  | 0 | 14.546196  | -0.764826 | 2.339228  |
| 132 | 6  | 0 | 16.412638  | -0.965041 | -1.045200 |

|     |    |   |           |           |           |
|-----|----|---|-----------|-----------|-----------|
| 133 | 1  | 0 | 14.468655 | -0.906919 | -1.958246 |
| 134 | 6  | 0 | 17.161886 | -0.954066 | 0.146632  |
| 135 | 1  | 0 | 17.004285 | -0.903874 | 2.298806  |
| 136 | 1  | 0 | 16.927430 | -1.008483 | -1.999937 |
| 137 | 6  | 0 | 18.632600 | -1.035299 | 0.129853  |
| 138 | 26 | 0 | 19.972191 | 0.422477  | -0.547885 |
| 139 | 6  | 0 | 19.525320 | -0.636408 | 1.182711  |
| 140 | 6  | 0 | 19.451405 | -1.546785 | -0.935616 |
| 141 | 6  | 0 | 20.862939 | -0.911147 | 0.775026  |
| 142 | 6  | 0 | 20.816856 | -1.475837 | -0.534705 |
| 143 | 6  | 0 | 18.886957 | 2.070335  | -1.204027 |
| 144 | 6  | 0 | 19.679918 | 1.548513  | -2.270673 |
| 145 | 6  | 0 | 21.050290 | 1.609803  | -1.872871 |
| 146 | 6  | 0 | 21.103426 | 2.167760  | -0.559902 |
| 147 | 6  | 0 | 19.766380 | 2.452399  | -0.146657 |
| 148 | 1  | 0 | 19.235502 | -0.167471 | 2.112591  |
| 149 | 1  | 0 | 19.092669 | -1.929185 | -1.880819 |
| 150 | 1  | 0 | 21.756546 | -0.691719 | 1.342961  |
| 151 | 1  | 0 | 21.668677 | -1.769568 | -1.132489 |
| 152 | 1  | 0 | 17.807021 | 2.122384  | -1.181841 |
| 153 | 1  | 0 | 19.307018 | 1.151470  | -3.204835 |
| 154 | 1  | 0 | 21.896143 | 1.264275  | -2.451284 |
| 155 | 1  | 0 | 21.996937 | 2.319629  | 0.029972  |
| 156 | 1  | 0 | 19.469048 | 2.857206  | 0.810930  |

-----  
Total Energy (HF) = - 3380.0407566 Hartree

### Ferrocenyl pyrazabole 11g

Standard orientation:

| Center<br>Number | Atomic<br>Number | Atomic<br>Type | Coordinates (Angstroms) |           |           |
|------------------|------------------|----------------|-------------------------|-----------|-----------|
|                  |                  |                | X                       | Y         | Z         |
| 1                | 7                | 0              | -1.241462               | 0.374494  | -0.682900 |
| 2                | 7                | 0              | -1.311723               | 0.201143  | 0.663164  |
| 3                | 6                | 0              | -2.601847               | 0.244324  | 1.030167  |
| 4                | 1                | 0              | -2.885928               | 0.132679  | 2.064655  |
| 5                | 6                | 0              | -3.407574               | 0.450931  | -0.099897 |
| 6                | 6                | 0              | -2.487724               | 0.524984  | -1.156958 |
| 7                | 1                | 0              | -2.663850               | 0.671954  | -2.210816 |
| 8                | 6                | 0              | 0.005920                | -0.900221 | -2.628036 |
| 9                | 1                | 0              | -0.824047               | -0.714644 | -3.328106 |
| 10               | 1                | 0              | 0.906357                | -0.858837 | -3.261247 |
| 11               | 6                | 0              | 0.215173                | 1.760760  | -2.397987 |
| 12               | 1                | 0              | 1.113457                | 1.691056  | -3.031747 |
| 13               | 1                | 0              | -0.614760               | 1.820519  | -3.119856 |
| 14               | 6                | 0              | -0.135164               | -2.321487 | -2.066223 |
| 15               | 1                | 0              | -1.037366               | -2.386824 | -1.442007 |



|    |   |   |           |           |           |
|----|---|---|-----------|-----------|-----------|
| 16 | 1 | 0 | 0.706855  | -2.542895 | -1.395588 |
| 17 | 5 | 0 | 0.067183  | 0.354356  | -1.587963 |
| 18 | 6 | 0 | 0.272446  | 3.076163  | -1.608905 |
| 19 | 1 | 0 | 1.120007  | 3.056247  | -0.909774 |
| 20 | 1 | 0 | -0.626037 | 3.175041  | -0.983824 |
| 21 | 7 | 0 | 1.210988  | -0.002972 | 0.769168  |
| 22 | 7 | 0 | 1.281408  | 0.166776  | -0.577348 |
| 23 | 6 | 0 | 2.570515  | 0.107332  | -0.945998 |
| 24 | 1 | 0 | 2.854349  | 0.212417  | -1.981242 |
| 25 | 6 | 0 | 3.375132  | -0.107279 | 0.183380  |
| 26 | 6 | 0 | 2.455899  | -0.167119 | 1.241900  |
| 27 | 1 | 0 | 2.631616  | -0.316061 | 2.295544  |
| 28 | 6 | 0 | -0.037678 | 1.276157  | 2.712192  |
| 29 | 1 | 0 | 0.791671  | 1.091934  | 3.413395  |
| 30 | 1 | 0 | -0.938896 | 1.234960  | 3.344332  |
| 31 | 6 | 0 | -0.243523 | -1.385575 | 2.486838  |
| 32 | 1 | 0 | -1.141637 | -1.316361 | 3.120842  |
| 33 | 1 | 0 | 0.586587  | -1.443673 | 3.208592  |
| 34 | 6 | 0 | 0.103254  | 2.696837  | 2.149020  |
| 35 | 1 | 0 | 1.006333  | 2.762077  | 1.526085  |
| 36 | 1 | 0 | -0.737876 | 2.916974  | 1.476887  |
| 37 | 5 | 0 | -0.097276 | 0.019958  | 1.674420  |
| 38 | 6 | 0 | -0.299531 | -2.701702 | 1.698754  |
| 39 | 1 | 0 | -1.147552 | -2.683340 | 1.000122  |
| 40 | 1 | 0 | 0.598690  | -2.799869 | 1.073153  |
| 41 | 6 | 0 | -0.204195 | -3.408915 | -3.148214 |
| 42 | 1 | 0 | -1.047207 | -3.194274 | -3.819715 |
| 43 | 1 | 0 | 0.698362  | -3.353215 | -3.772860 |
| 44 | 6 | 0 | -0.419845 | -3.947205 | 2.589005  |
| 45 | 1 | 0 | 0.427660  | -3.972503 | 3.288203  |
| 46 | 1 | 0 | -1.320338 | -3.858195 | 3.212766  |
| 47 | 6 | 0 | -0.471981 | -5.260359 | 1.801518  |
| 48 | 1 | 0 | 0.433257  | -5.397547 | 1.198798  |
| 49 | 1 | 0 | -0.561950 | -6.125789 | 2.466898  |
| 50 | 1 | 0 | -1.327184 | -5.277700 | 1.116081  |
| 51 | 6 | 0 | -0.348153 | -4.826192 | -2.584351 |
| 52 | 1 | 0 | 0.495838  | -5.081516 | -1.933171 |
| 53 | 1 | 0 | -1.262811 | -4.924901 | -1.988351 |
| 54 | 1 | 0 | -0.389907 | -5.574990 | -3.382687 |
| 55 | 6 | 0 | 0.394933  | 4.321998  | -2.498407 |
| 56 | 1 | 0 | -0.452096 | 4.348713  | -3.198138 |
| 57 | 1 | 0 | 1.295696  | 4.232108  | -3.121647 |
| 58 | 6 | 0 | 0.169882  | 3.785393  | 3.230029  |
| 59 | 1 | 0 | 1.011998  | 3.571977  | 3.903052  |
| 60 | 1 | 0 | -0.733598 | 3.729657  | 3.853330  |
| 61 | 6 | 0 | 0.313725  | 5.202246  | 2.665083  |
| 62 | 1 | 0 | 0.353854  | 5.951794  | 3.462801  |
| 63 | 1 | 0 | 1.229145  | 5.301031  | 2.070267  |
| 64 | 1 | 0 | -0.529512 | 5.456440  | 2.012488  |
| 65 | 6 | 0 | 0.448294  | 5.634752  | -1.710348 |
| 66 | 1 | 0 | 0.539701  | 6.500335  | -2.375337 |
| 67 | 1 | 0 | -0.457069 | 5.772851  | -1.108022 |

|     |    |   |            |           |           |
|-----|----|---|------------|-----------|-----------|
| 68  | 1  | 0 | 1.303169   | 5.650761  | -1.024472 |
| 69  | 6  | 0 | 4.780103   | -0.247515 | 0.243312  |
| 70  | 6  | 0 | 5.987731   | -0.380783 | 0.300316  |
| 71  | 6  | 0 | -4.815279  | 0.560284  | -0.160903 |
| 72  | 6  | 0 | -6.026578  | 0.655365  | -0.216221 |
| 73  | 6  | 0 | 7.397596   | -0.553737 | 0.373250  |
| 74  | 6  | 0 | 8.022582   | -0.885718 | 1.591566  |
| 75  | 6  | 0 | 8.208010   | -0.405495 | -0.773597 |
| 76  | 6  | 0 | 9.397333   | -1.067880 | 1.650923  |
| 77  | 1  | 0 | 7.416671   | -1.001823 | 2.484416  |
| 78  | 6  | 0 | 9.580222   | -0.588215 | -0.702932 |
| 79  | 1  | 0 | 7.742082   | -0.145484 | -1.718770 |
| 80  | 6  | 0 | 10.213681  | -0.930809 | 0.510434  |
| 81  | 1  | 0 | 9.858483   | -1.328601 | 2.600146  |
| 82  | 1  | 0 | 10.170335  | -0.462703 | -1.605351 |
| 83  | 6  | 0 | -7.442825  | 0.767481  | -0.284838 |
| 84  | 6  | 0 | -8.082009  | 1.146032  | -1.481926 |
| 85  | 6  | 0 | -8.246667  | 0.501544  | 0.845342  |
| 86  | 6  | 0 | -9.464932  | 1.252150  | -1.538657 |
| 87  | 1  | 0 | -7.481177  | 1.355257  | -2.361153 |
| 88  | 6  | 0 | -9.626809  | 0.608729  | 0.777345  |
| 89  | 1  | 0 | -7.769199  | 0.208462  | 1.774957  |
| 90  | 6  | 0 | -10.275922 | 0.987680  | -0.416915 |
| 91  | 1  | 0 | -9.937498  | 1.547050  | -2.472145 |
| 92  | 1  | 0 | -10.210875 | 0.394084  | 1.666844  |
| 93  | 6  | 0 | -11.726908 | 1.117937  | -0.547146 |
| 94  | 1  | 0 | -12.069665 | 1.421971  | -1.535202 |
| 95  | 6  | 0 | -12.654298 | 0.908589  | 0.410824  |
| 96  | 1  | 0 | -12.338880 | 0.628640  | 1.414288  |
| 97  | 6  | 0 | 11.652798  | -1.156517 | 0.641234  |
| 98  | 1  | 0 | 11.987434  | -1.384184 | 1.652352  |
| 99  | 6  | 0 | 12.576849  | -1.132894 | -0.342200 |
| 100 | 1  | 0 | 12.268382  | -0.942779 | -1.368664 |
| 101 | 6  | 0 | 14.000768  | -1.385262 | -0.166494 |
| 102 | 26 | 0 | 15.540141  | 0.039499  | -0.191297 |
| 103 | 6  | 0 | 14.756591  | -1.423681 | 1.056085  |
| 104 | 6  | 0 | 14.927971  | -1.641752 | -1.236061 |
| 105 | 6  | 0 | 16.112196  | -1.729448 | 0.740521  |
| 106 | 6  | 0 | 16.219271  | -1.863191 | -0.677249 |
| 107 | 6  | 0 | 14.706864  | 1.929033  | -0.445849 |
| 108 | 6  | 0 | 15.625026  | 1.650625  | -1.503645 |
| 109 | 6  | 0 | 16.909993  | 1.423447  | -0.923834 |
| 110 | 6  | 0 | 16.785348  | 1.558739  | 0.491905  |
| 111 | 6  | 0 | 15.423320  | 1.871071  | 0.787167  |
| 112 | 1  | 0 | 14.368702  | -1.227103 | 2.045874  |
| 113 | 1  | 0 | 14.677059  | -1.656674 | -2.288334 |
| 114 | 1  | 0 | 16.925805  | -1.805082 | 1.448810  |
| 115 | 1  | 0 | 17.126353  | -2.063669 | -1.230542 |
| 116 | 1  | 0 | 13.646123  | 2.109056  | -0.554326 |
| 117 | 1  | 0 | 15.384276  | 1.594957  | -2.556378 |
| 118 | 1  | 0 | 17.811884  | 1.161256  | -1.459954 |
| 119 | 1  | 0 | 17.576309  | 1.417841  | 1.215767  |

|     |    |   |            |           |           |
|-----|----|---|------------|-----------|-----------|
| 120 | 1  | 0 | 15.001988  | 2.010441  | 1.773225  |
| 121 | 6  | 0 | -14.094358 | 1.047236  | 0.239893  |
| 122 | 26 | 0 | -15.470570 | -0.521752 | 0.038383  |
| 123 | 6  | 0 | -15.051253 | 1.057247  | 1.314184  |
| 124 | 6  | 0 | -14.841603 | 1.173102  | -0.982158 |
| 125 | 6  | 0 | -16.354977 | 1.214459  | 0.762756  |
| 126 | 6  | 0 | -16.224328 | 1.287209  | -0.657337 |
| 127 | 6  | 0 | -14.440078 | -2.329117 | 0.068896  |
| 128 | 6  | 0 | -15.131041 | -2.178968 | -1.170848 |
| 129 | 6  | 0 | -16.525487 | -2.056741 | -0.886705 |
| 130 | 6  | 0 | -16.695477 | -2.130812 | 0.528824  |
| 131 | 6  | 0 | -15.406373 | -2.297265 | 1.119878  |
| 132 | 1  | 0 | -14.811155 | 0.954384  | 2.364102  |
| 133 | 1  | 0 | -14.428681 | 1.157883  | -1.981036 |
| 134 | 1  | 0 | -17.282040 | 1.239932  | 1.318714  |
| 135 | 1  | 0 | -17.036531 | 1.371671  | -1.366303 |
| 136 | 1  | 0 | -13.368562 | -2.407563 | 0.191334  |
| 137 | 1  | 0 | -14.675230 | -2.134859 | -2.150302 |
| 138 | 1  | 0 | -17.311328 | -1.903794 | -1.613743 |
| 139 | 1  | 0 | -17.632407 | -2.042440 | 1.061538  |
| 140 | 1  | 0 | -15.196550 | -2.361529 | 2.178796  |

-----  
Total Energy (HF) = -2920.4247373 Hartree

### III. Copies of $^1\text{H}$ NMR, $^{13}\text{C}$ NMR and HRMS Spectra of the New Compounds.

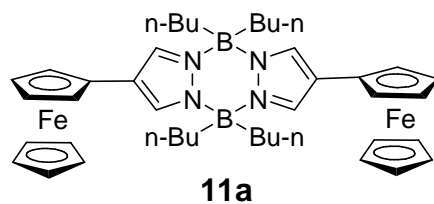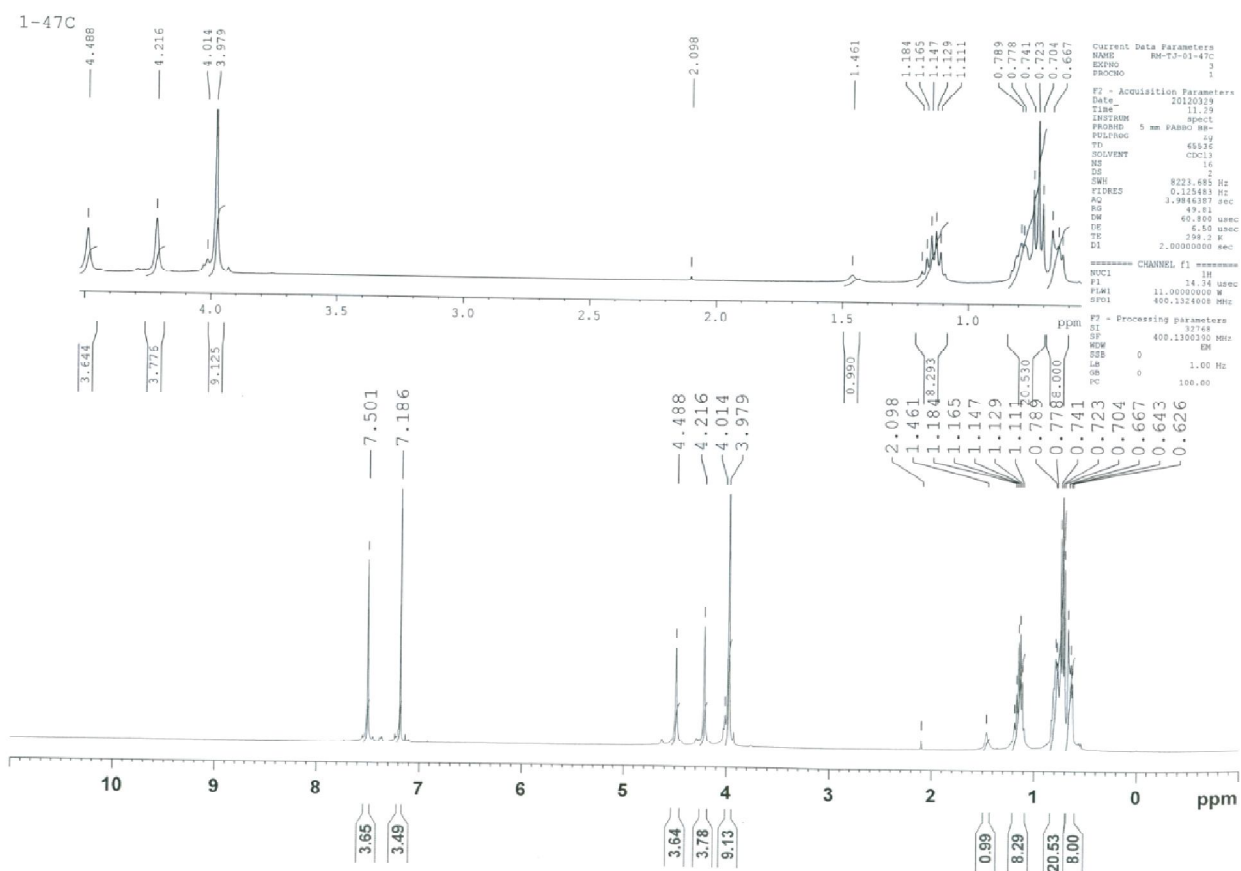

Figure S-6:  $^1\text{H}$ -NMR spectrum of compound **11a**.

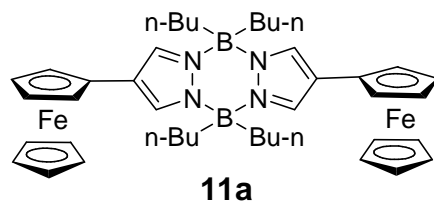

1-47C

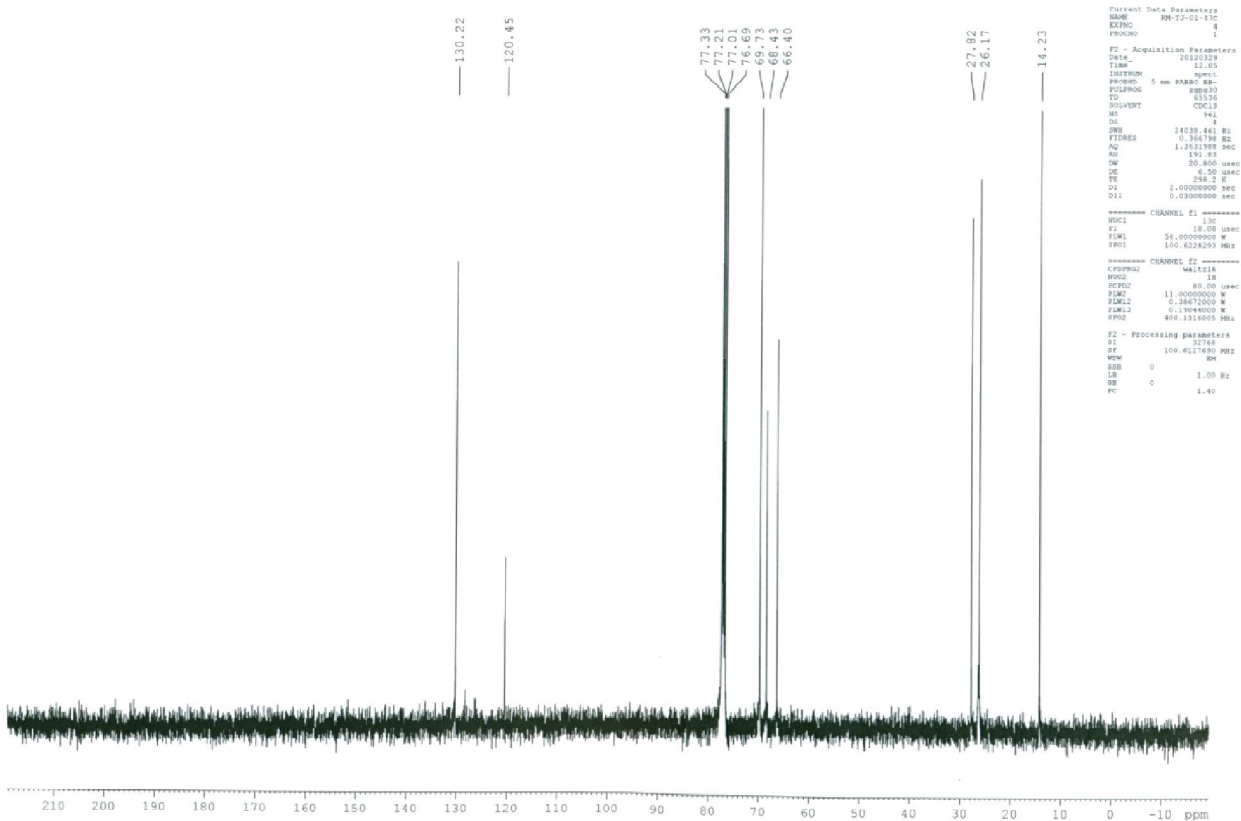

**Figure S-7:**  $^{13}\text{C}$ -NMR spectrum of compound **11a**.

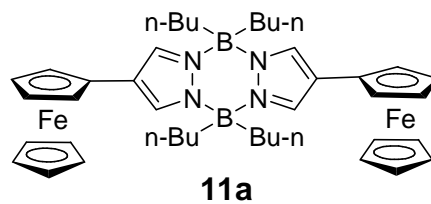

### Display Report

|                      |                                                 |                  |                      |
|----------------------|-------------------------------------------------|------------------|----------------------|
| <b>Analysis Info</b> |                                                 | Acquisition Date | 5/25/2012 3:10:15 PM |
| Analysis Name        | D:\Data\Data\UserData\RM-TJ-1-47-B 25-05-2012.d | Operator         | RAJESH VASHISTH      |
| Method               | tune_wide.m                                     | Instrument       | micrOTOF-Q II 10348  |
| Sample Name          | in chloroform                                   |                  |                      |
| Comment              |                                                 |                  |                      |

|                              |            |                       |           |                  |           |
|------------------------------|------------|-----------------------|-----------|------------------|-----------|
| <b>Acquisition Parameter</b> |            |                       |           |                  |           |
| Source Type                  | ESI        | Ion Polarity          | Positive  | Set Nebulizer    | 0.4 Bar   |
| Focus                        | Not active | Set Capillary         | 4500 V    | Set Dry Heater   | 180 °C    |
| Scan Begin                   | 50 m/z     | Set End Plate Offset  | -500 V    | Set Dry Gas      | 4.0 l/min |
| Scan End                     | 3000 m/z   | Set Collision Cell RF | 650.0 Vpp | Set Divert Valve | Waste     |

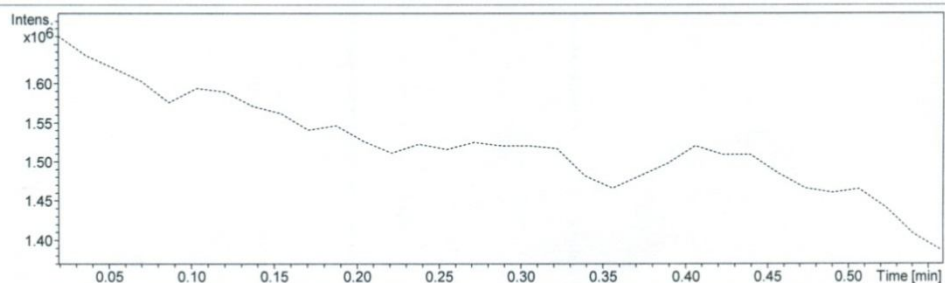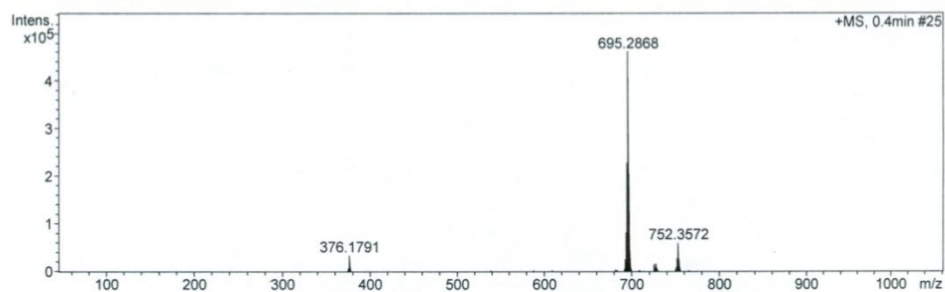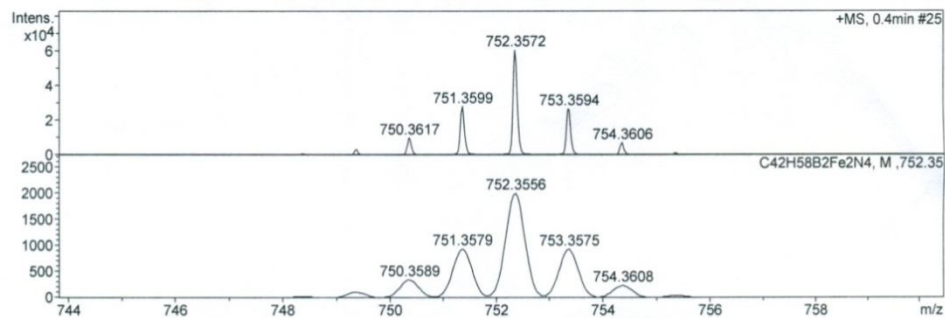

**Figure S-8:** HRMS spectrum of compound **11a**.

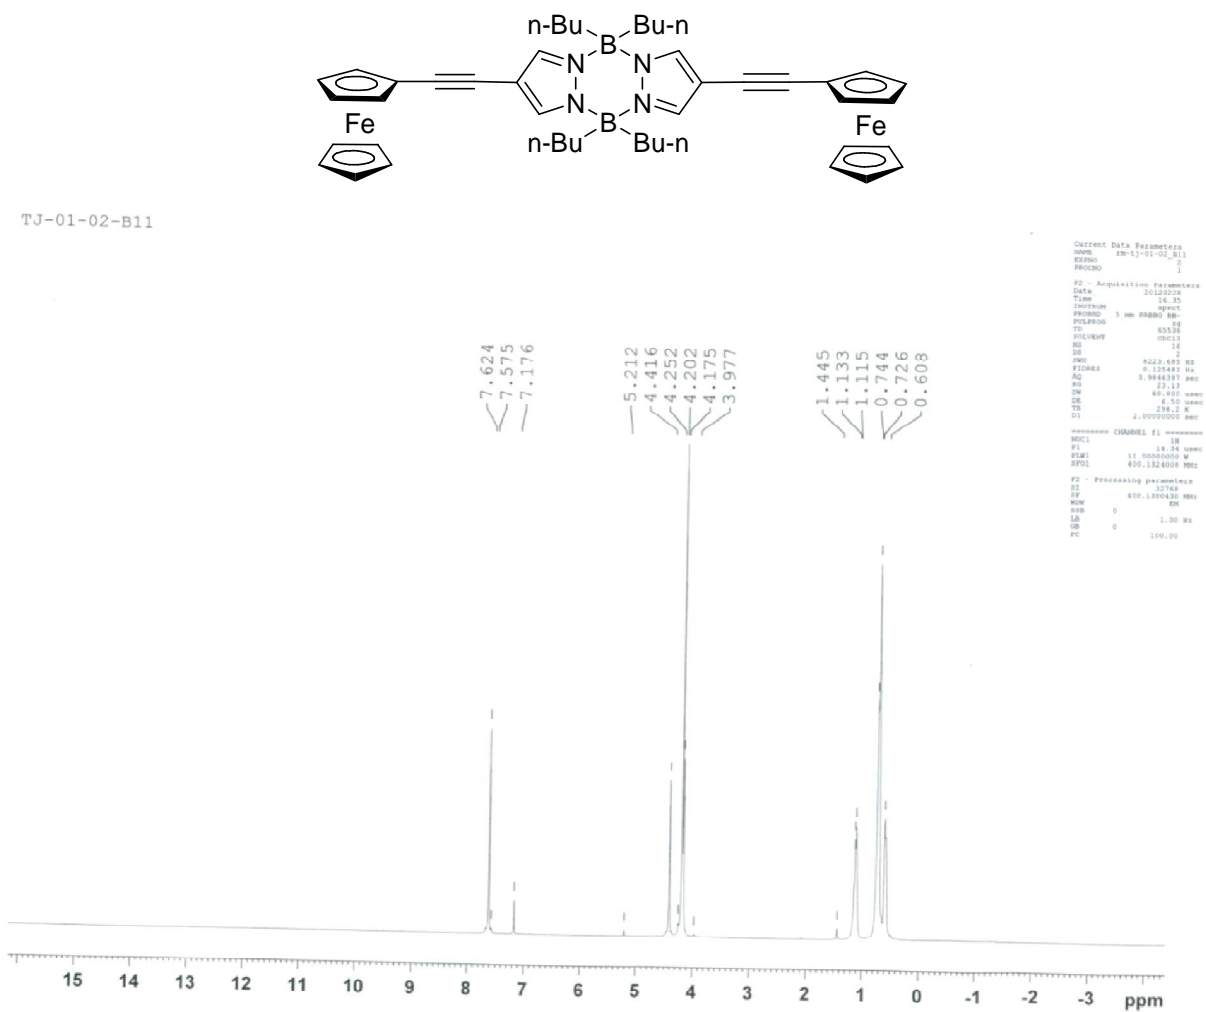

**Figure S-9:**  $^1\text{H}$ -NMR spectrum of compound **11b**.

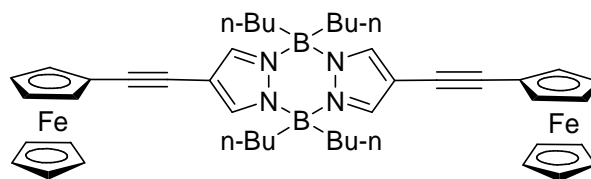

**11b**

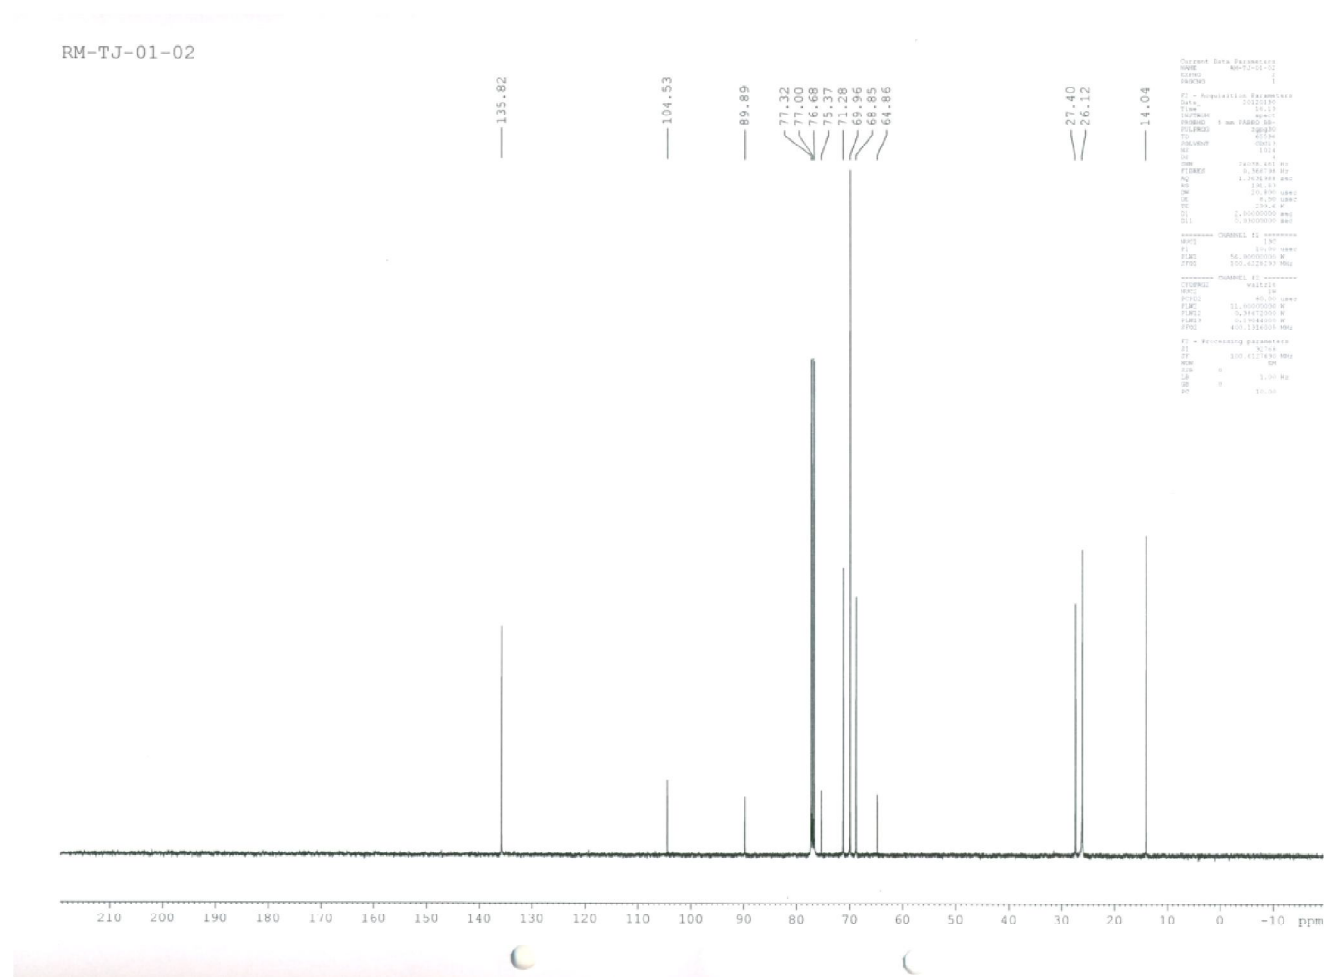

**Figure S-10:**  $^{13}\text{C}$ -NMR spectrum of compound **11b**.



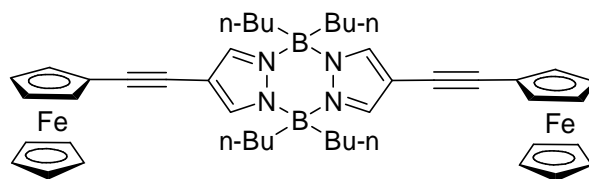

**11b**

### Display Report

|                                                        |                  |                      |
|--------------------------------------------------------|------------------|----------------------|
| <b>Analysis Info</b>                                   | Acquisition Date | 3/24/2012 1:28:50 PM |
| Analysis Name D:\Data\UserData\Rajneesh MRM-TJ-01-02.d | Operator         | RAJESH VASHISTH      |
| Method tune_wide.m                                     | Instrument       | micrOTOF-Q II 10348  |
| Sample Name                                            |                  |                      |
| Comment                                                |                  |                      |

|                              |            |                       |           |                  |           |
|------------------------------|------------|-----------------------|-----------|------------------|-----------|
| <b>Acquisition Parameter</b> |            |                       |           |                  |           |
| Source Type                  | ESI        | Ion Polarity          | Positive  | Set Nebulizer    | 0.4 Bar   |
| Focus                        | Not active | Set Capillary         | 4500 V    | Set Dry Heater   | 180 °C    |
| Scan Begin                   | 50 m/z     | Set End Plate Offset  | -500 V    | Set Dry Gas      | 4.0 l/min |
| Scan End                     | 3000 m/z   | Set Collision Cell RF | 650.0 Vpp | Set Divert Valve | Waste     |

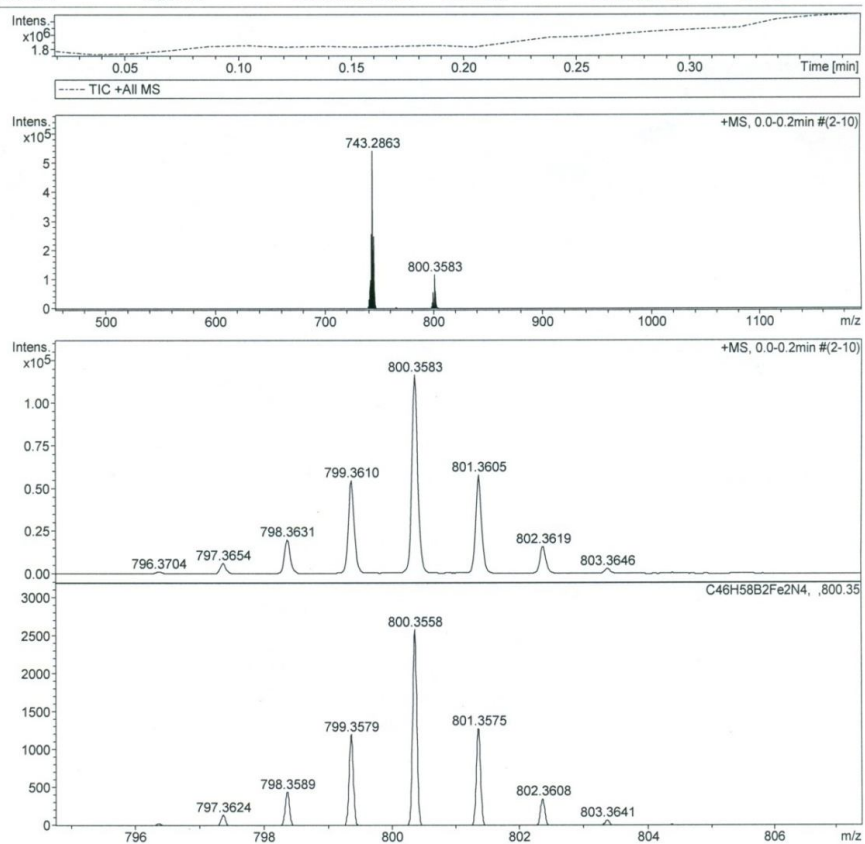

**Figure S-11: HRMS spectrum of compound 11b.**

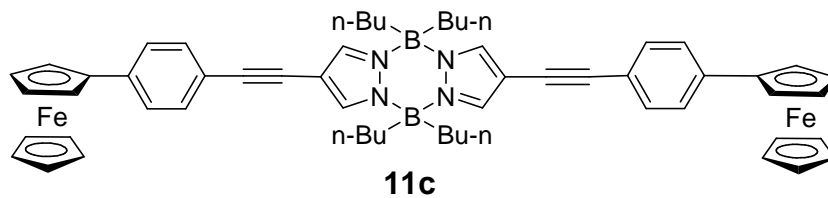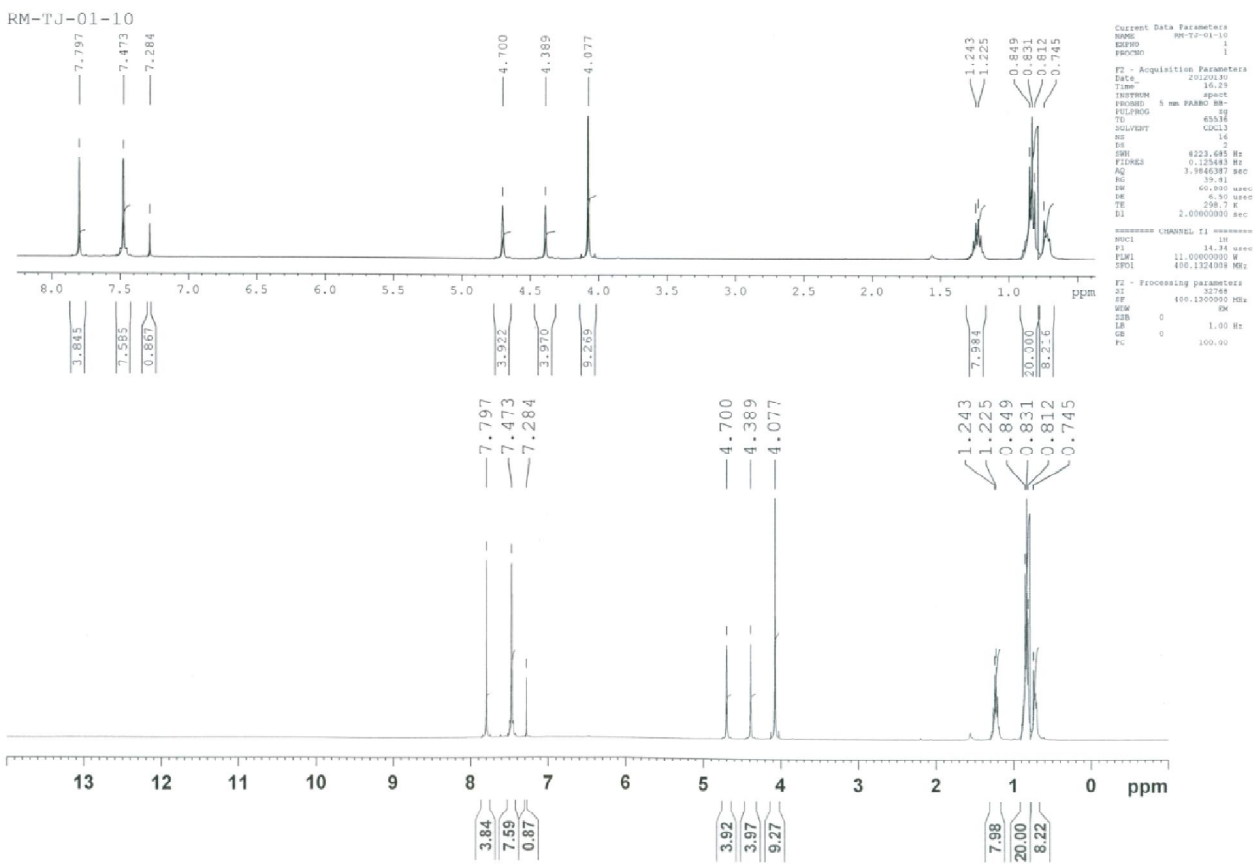

Figure S-12: <sup>1</sup>H-NMR spectrum of compound **11c**.

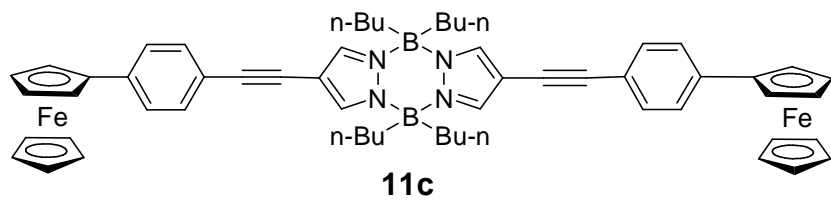

RM-TJ-01-10

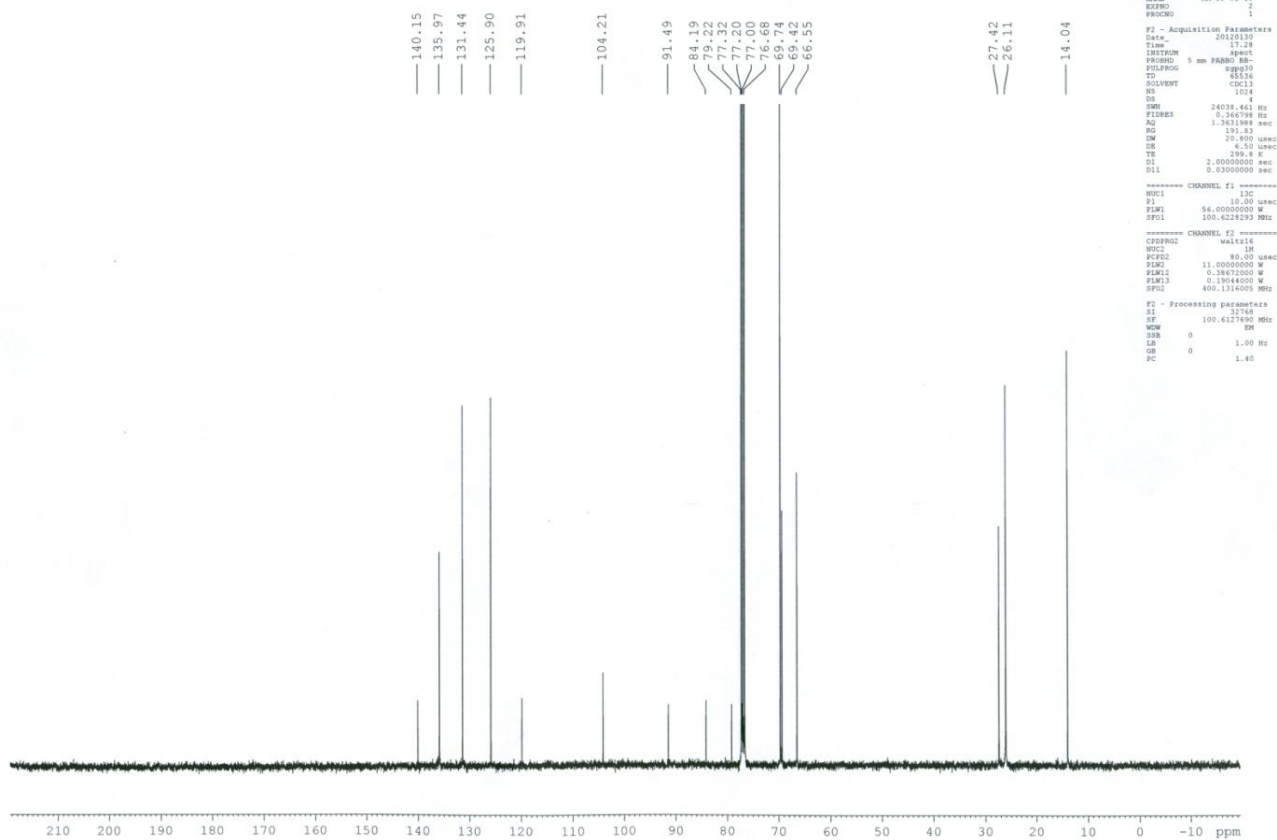

Figure S-13: <sup>13</sup>C-NMR spectrum of compound **11c**.

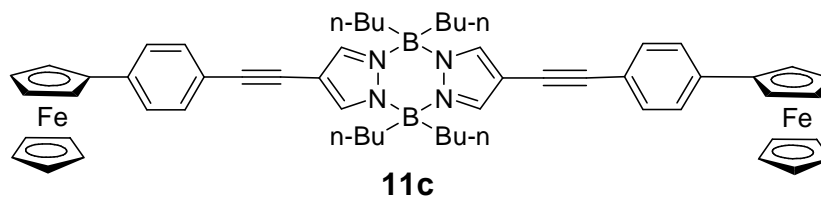

### Display Report

|                      |                                          |                  |                      |
|----------------------|------------------------------------------|------------------|----------------------|
| <b>Analysis Info</b> |                                          | Acquisition Date | 3/24/2012 4:44:06 PM |
| Analysis Name        | D:\Data\UserData\Rajneesh\MRM-TJ-01-10.d | Operator         | RAJESH VASHISTH      |
| Method               | tune_wide.m                              | Instrument       | micrOTOF-Q II 10348  |
| Sample Name          |                                          |                  |                      |
| Comment              |                                          |                  |                      |

#### Acquisition Parameter

|             |            |                       |           |                  |           |
|-------------|------------|-----------------------|-----------|------------------|-----------|
| Source Type | ESI        | Ion Polarity          | Positive  | Set Nebulizer    | 0.4 Bar   |
| Focus       | Not active | Set Capillary         | 4500 V    | Set Dry Heater   | 180 °C    |
| Scan Begin  | 50 m/z     | Set End Plate Offset  | -500 V    | Set Dry Gas      | 4.0 l/min |
| Scan End    | 3000 m/z   | Set Collision Cell RF | 650.0 Vpp | Set Divert Valve | Waste     |

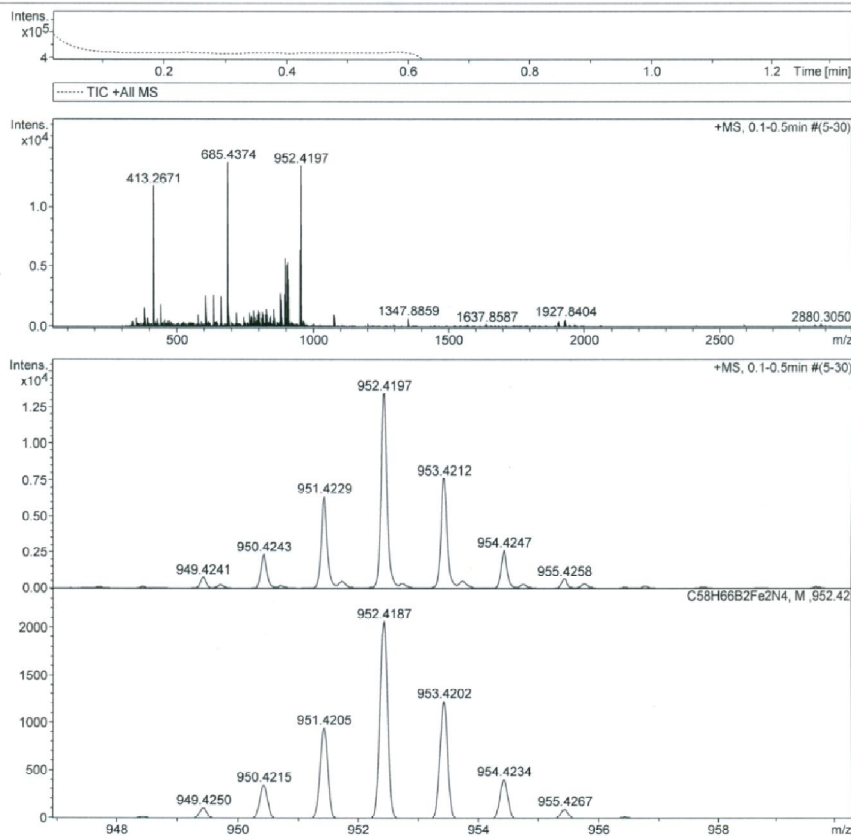

**Figure S-14:** HRMS spectrum of compound **11c**.

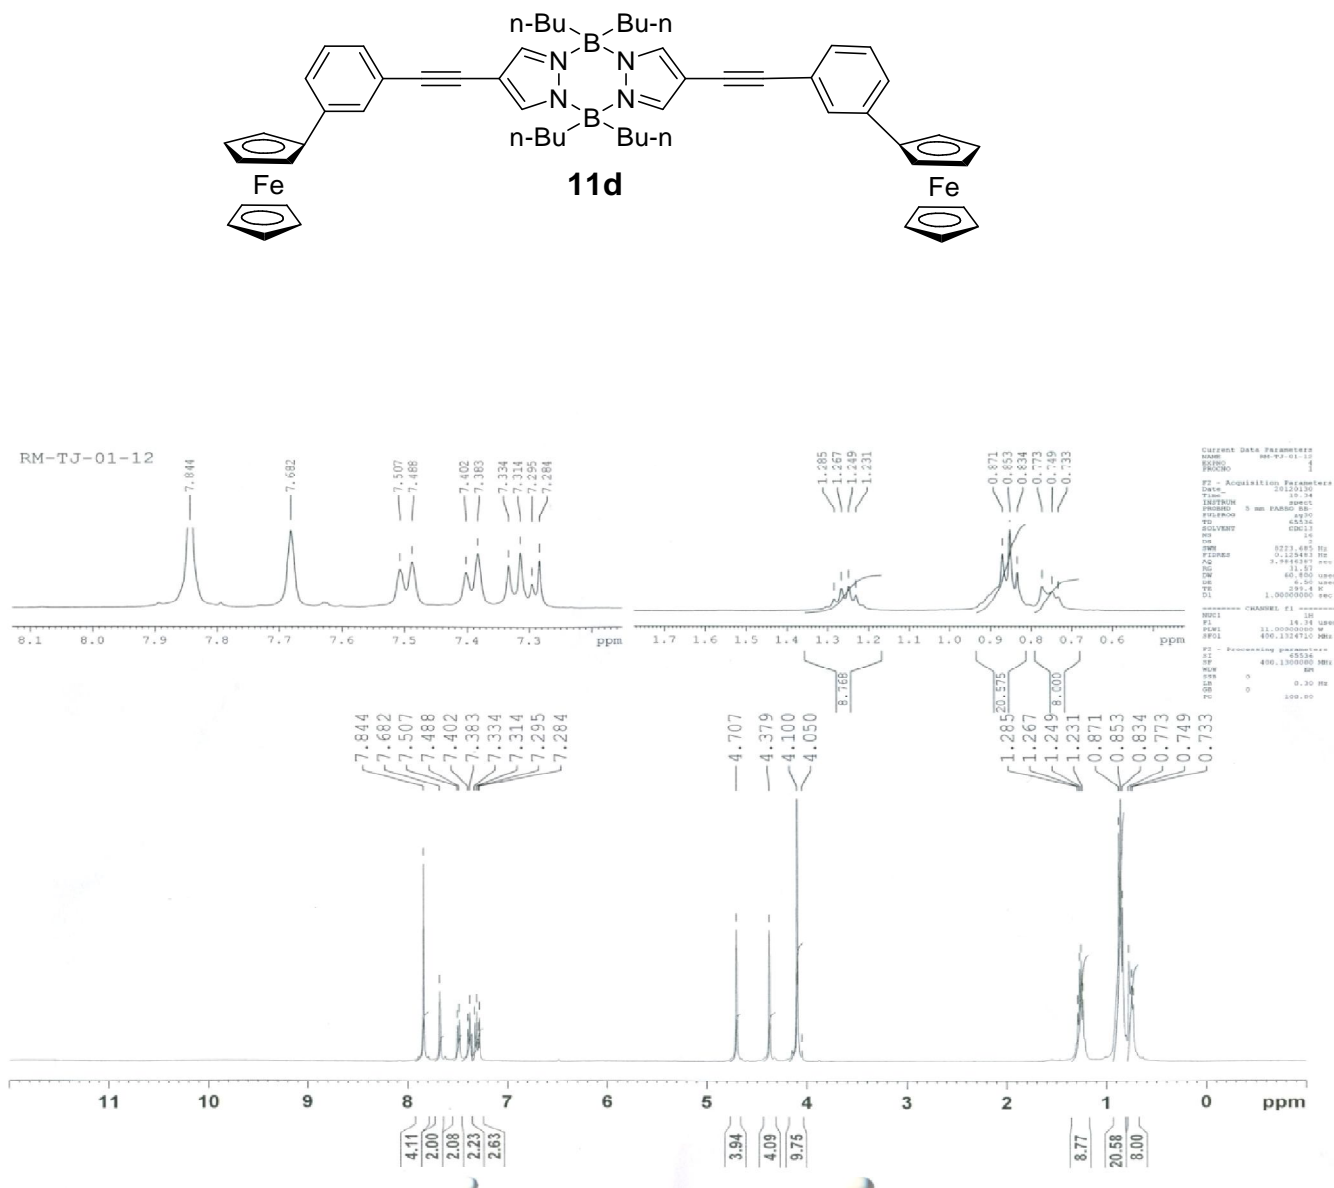

Figure S-15:  $^1\text{H-NMR}$  spectrum of compound **11d**.

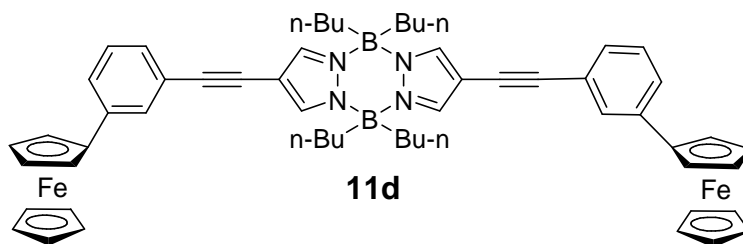

RM-TJ-01-12

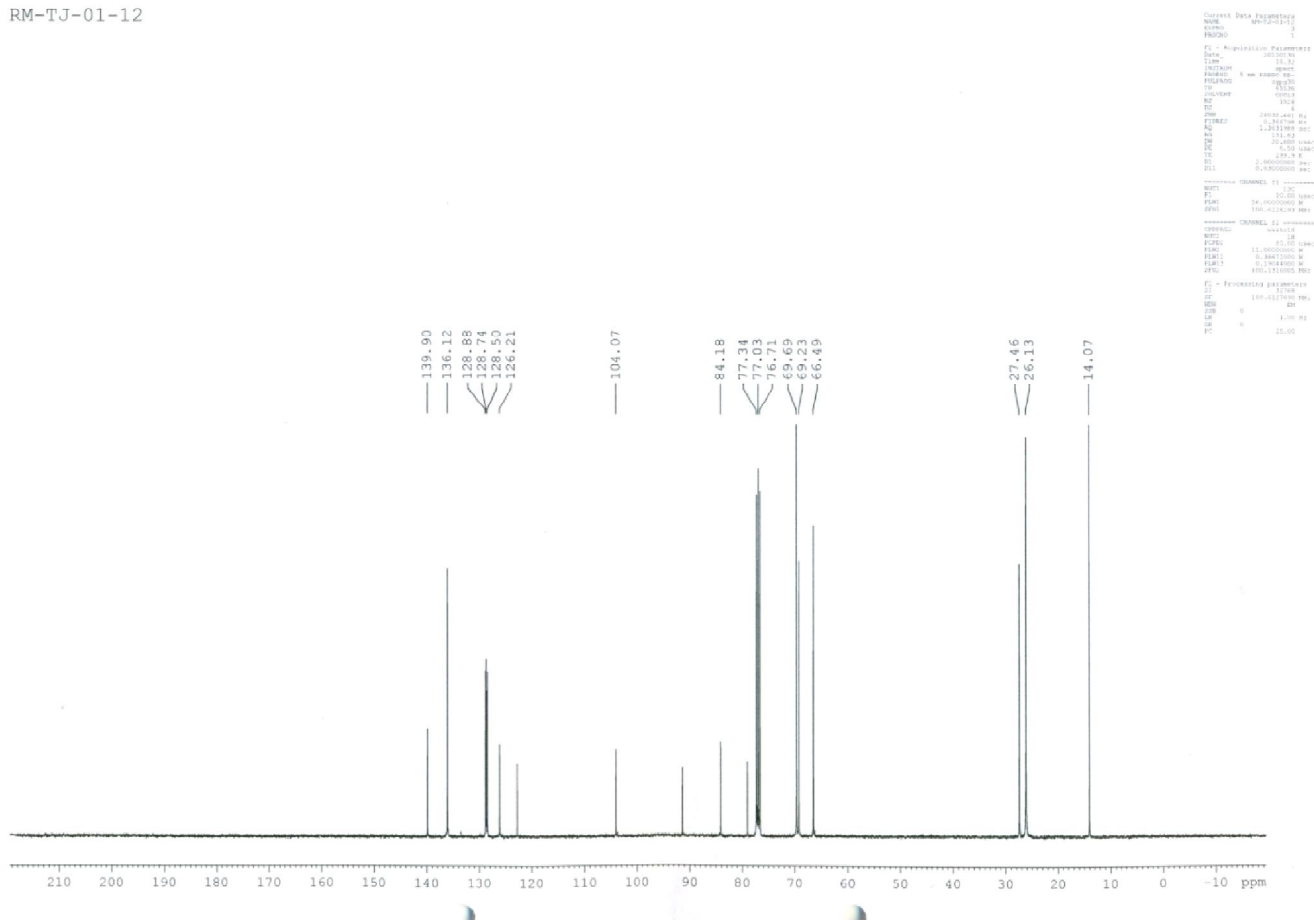

**Figure S-16:**  $^{13}\text{C}$ -NMR spectrum of compound **11d**.

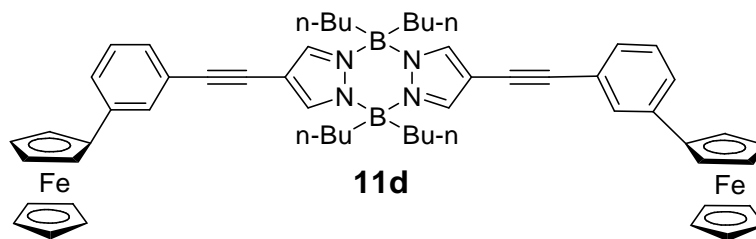

### Display Report

|                      |                                               |                      |                     |
|----------------------|-----------------------------------------------|----------------------|---------------------|
| <b>Analysis Info</b> | Acquisition Date                              | 5/25/2012 3:22:34 PM |                     |
| Analysis Name        | D:\Data\Data\UserData\RM-TJ-1-12 25-05-2012.d |                      |                     |
| Method               | tune_wide.m                                   | Operator             | RAJESH VASHISTH     |
| Sample Name          | in chloroform                                 | Instrument           | micrOTOF-Q II 10348 |
| Comment              |                                               |                      |                     |

|                              |            |                       |           |                  |           |
|------------------------------|------------|-----------------------|-----------|------------------|-----------|
| <b>Acquisition Parameter</b> |            |                       |           |                  |           |
| Source Type                  | ESI        | Ion Polarity          | Positive  | Set Nebulizer    | 0.4 Bar   |
| Focus                        | Not active | Set Capillary         | 4500 V    | Set Dry Heater   | 180 °C    |
| Scan Begin                   | 50 m/z     | Set End Plate Offset  | -500 V    | Set Dry Gas      | 4.0 l/min |
| Scan End                     | 3000 m/z   | Set Collision Cell RF | 650.0 Vpp | Set Divert Valve | Waste     |

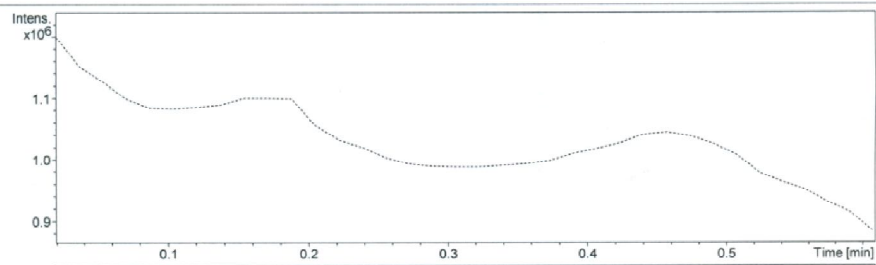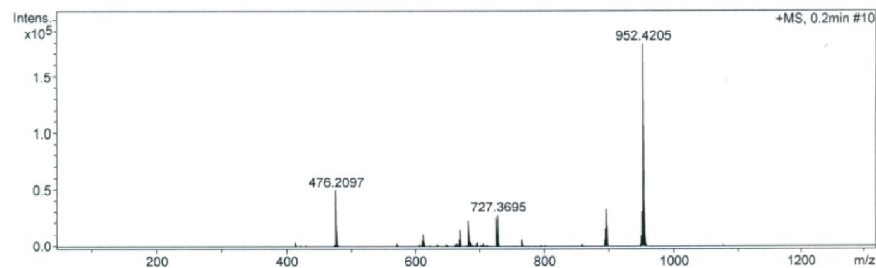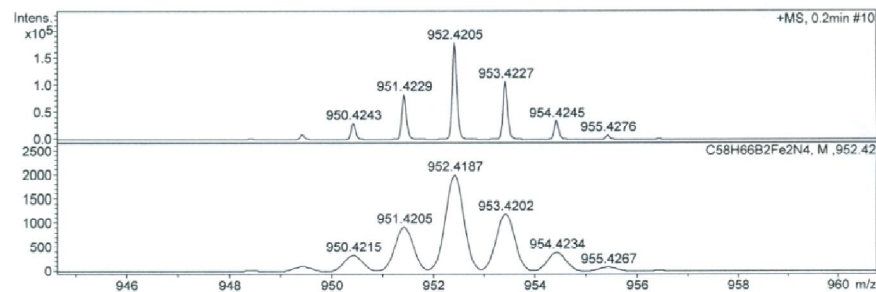

**Figure S-17:** HRMS spectrum of compound **11d**.

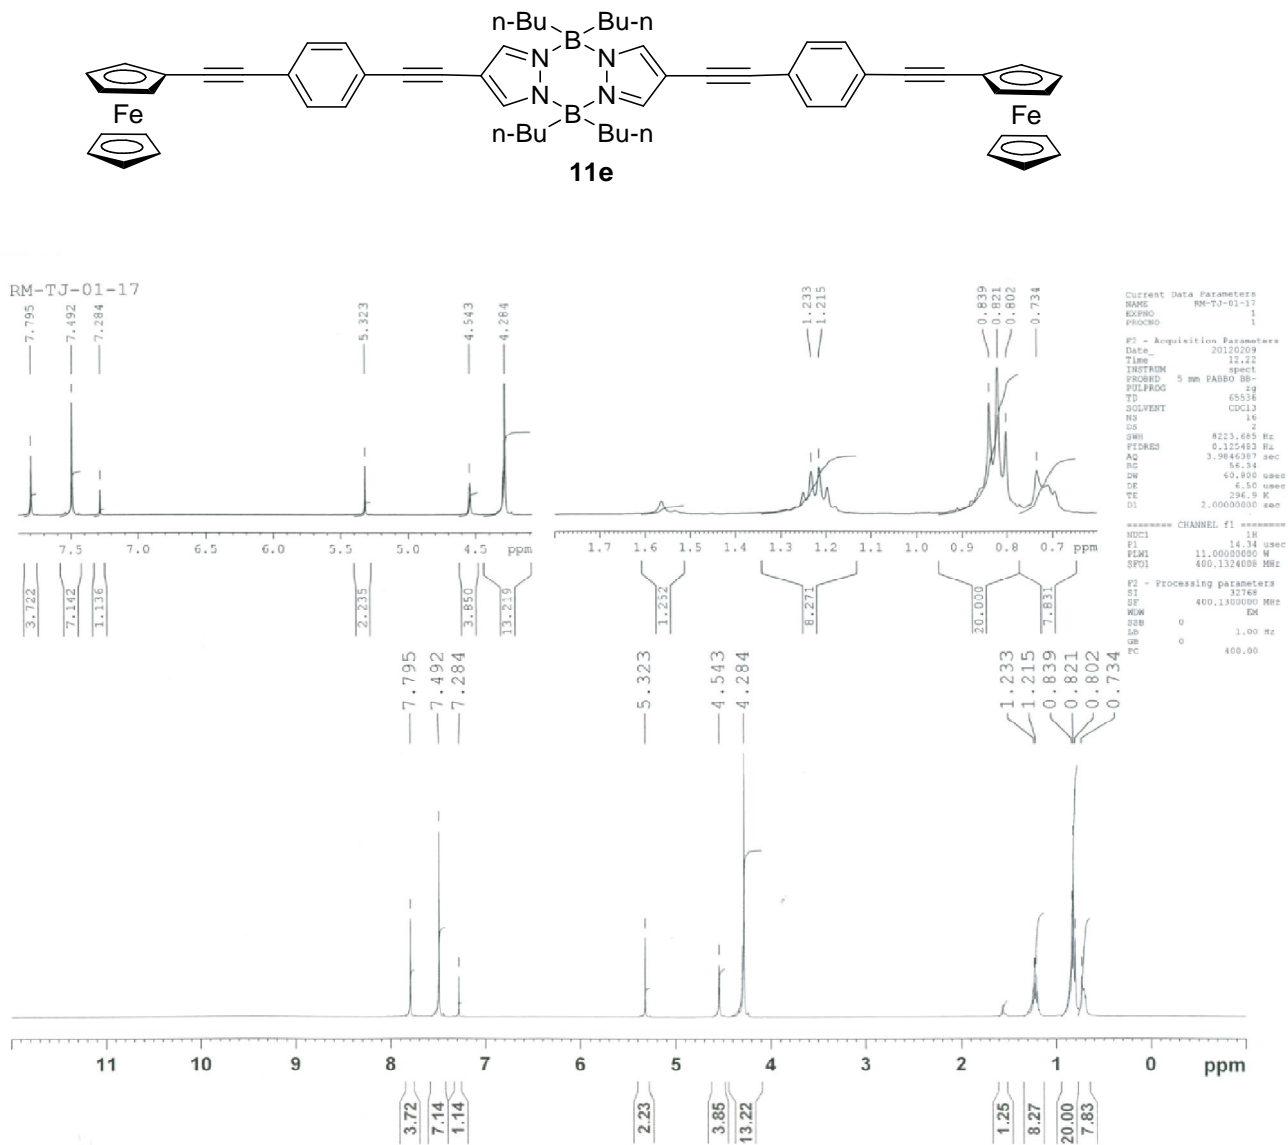

Figure S-18: <sup>1</sup>H-NMR spectrum of compound **11e**.



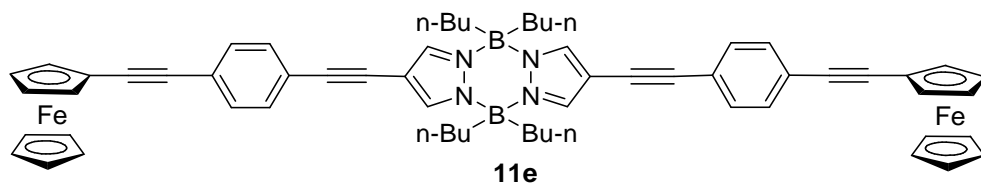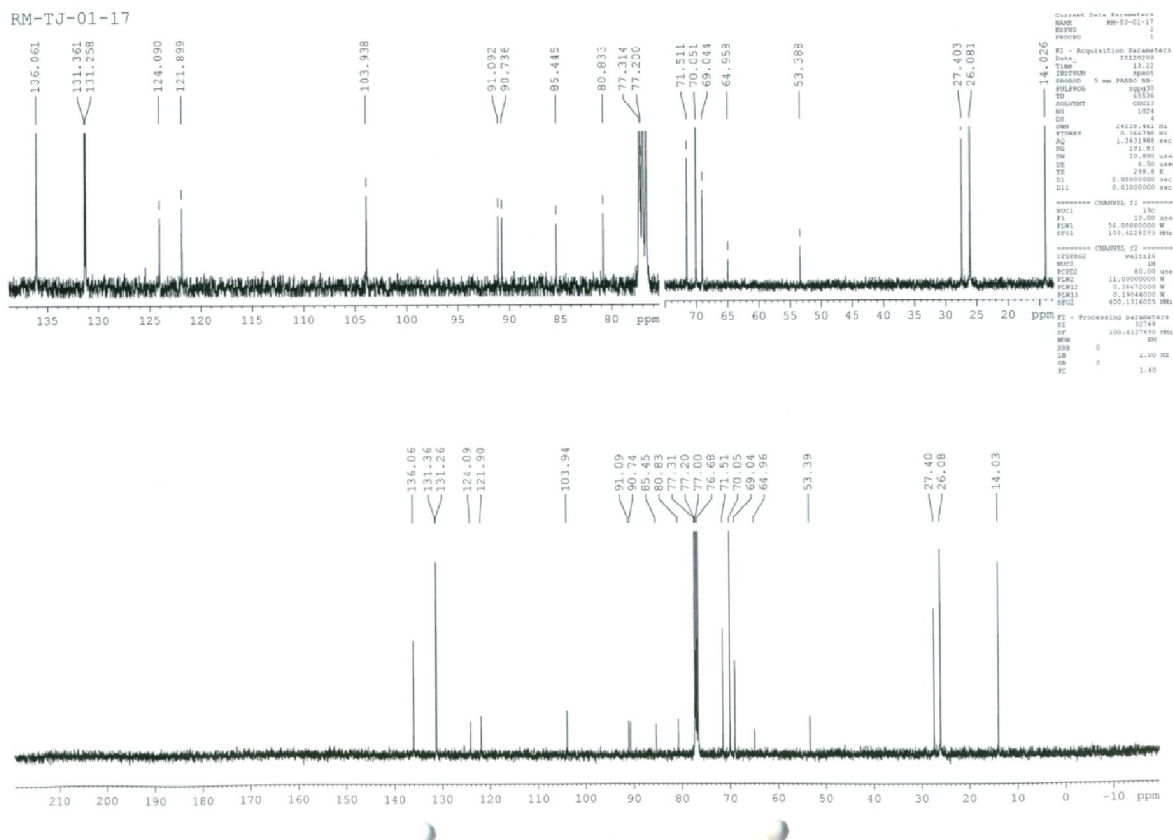

**Figure S-19:**  $^{13}\text{C}$ -NMR spectrum of compound **11e**.

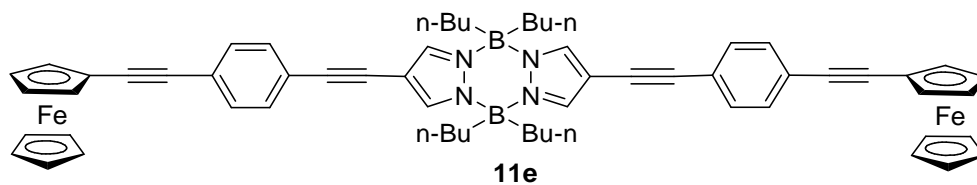

### Display Report

#### Analysis Info

Analysis Name D:\Data\UserData\Rajneesh MRM-TJ-01-17\_2.d  
Method tune\_wide.m  
Sample Name  
Comment

Acquisition Date 3/24/2012 3:54:42 PM

Operator RAJESH VASHISTH  
Instrument micrOTOF-Q II 10348

#### Acquisition Parameter

|             |            |                       |           |                  |           |
|-------------|------------|-----------------------|-----------|------------------|-----------|
| Source Type | ESI        | Ion Polarity          | Positive  | Set Nebulizer    | 0.4 Bar   |
| Focus       | Not active | Set Capillary         | 4500 V    | Set Dry Heater   | 180 °C    |
| Scan Begin  | 50 m/z     | Set End Plate Offset  | -500 V    | Set Dry Gas      | 4.0 l/min |
| Scan End    | 3000 m/z   | Set Collision Cell RF | 650.0 Vpp | Set Divert Valve | Waste     |

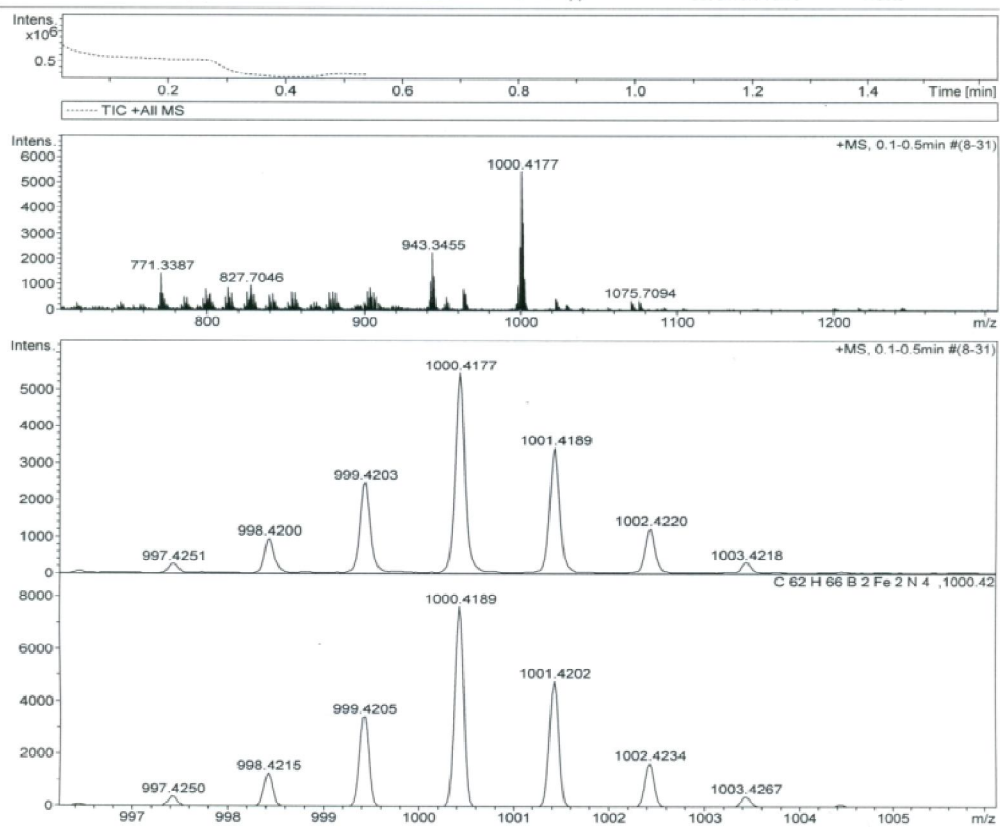

**Figure S-20:** HRMS spectrum of compound **11e**.

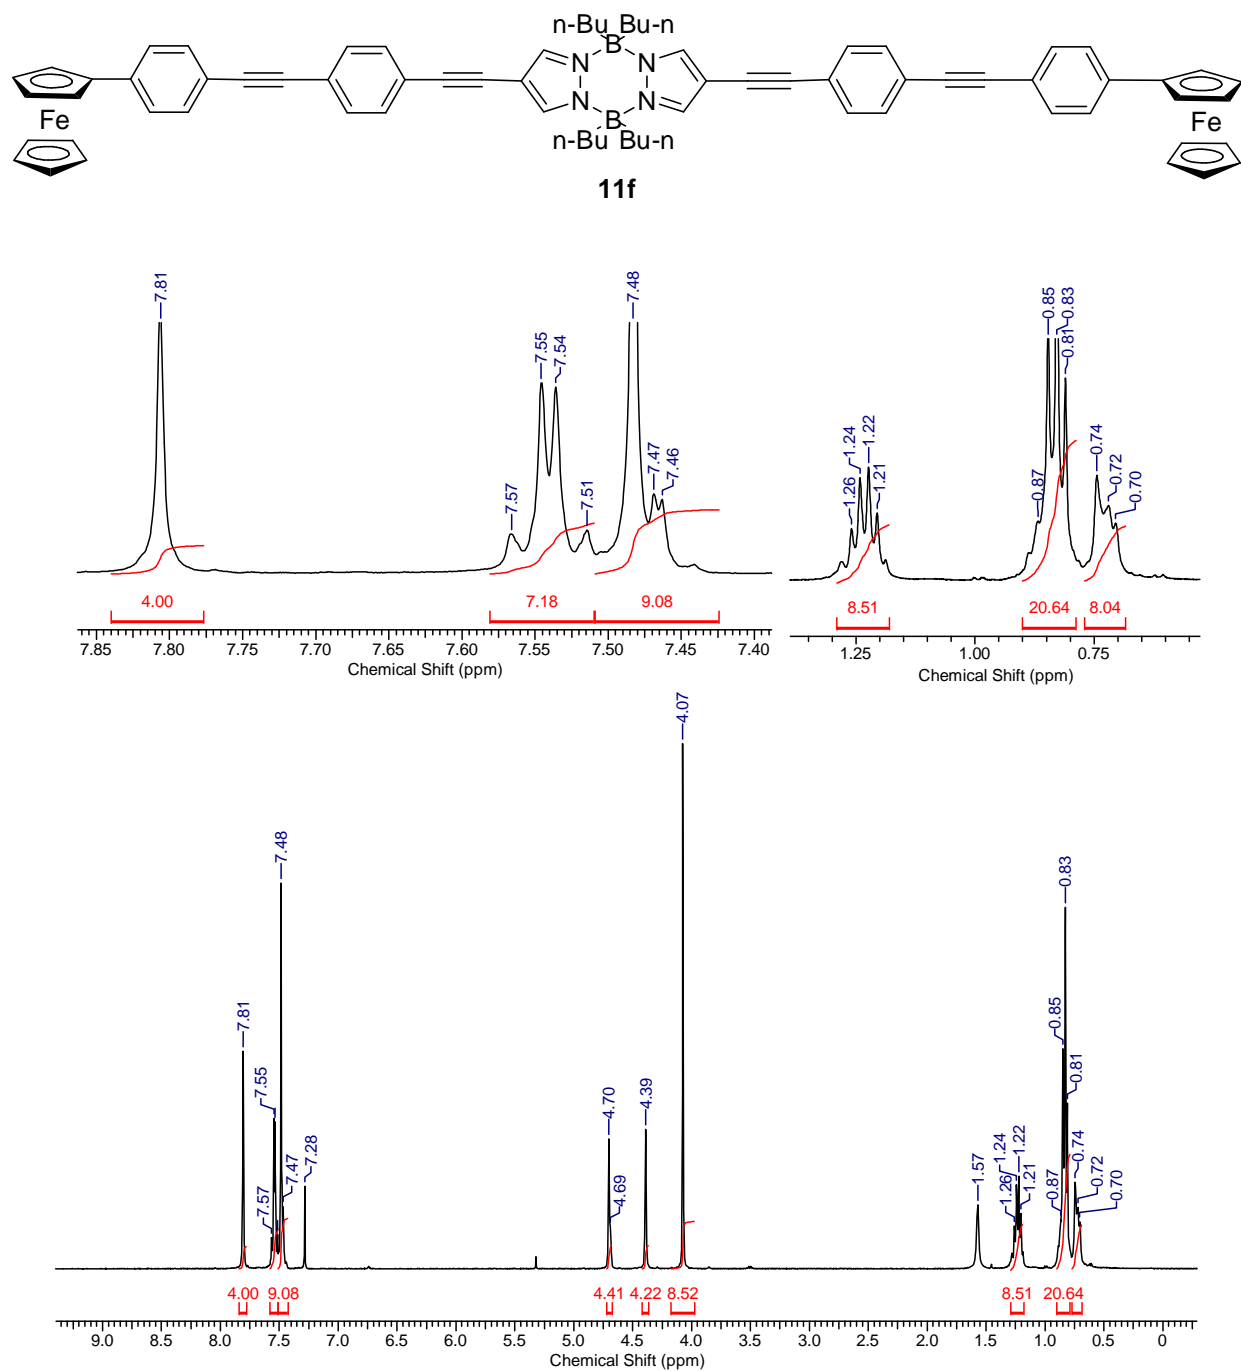

**Figure S-21:** <sup>1</sup>H-NMR spectrum of compound **11f**.

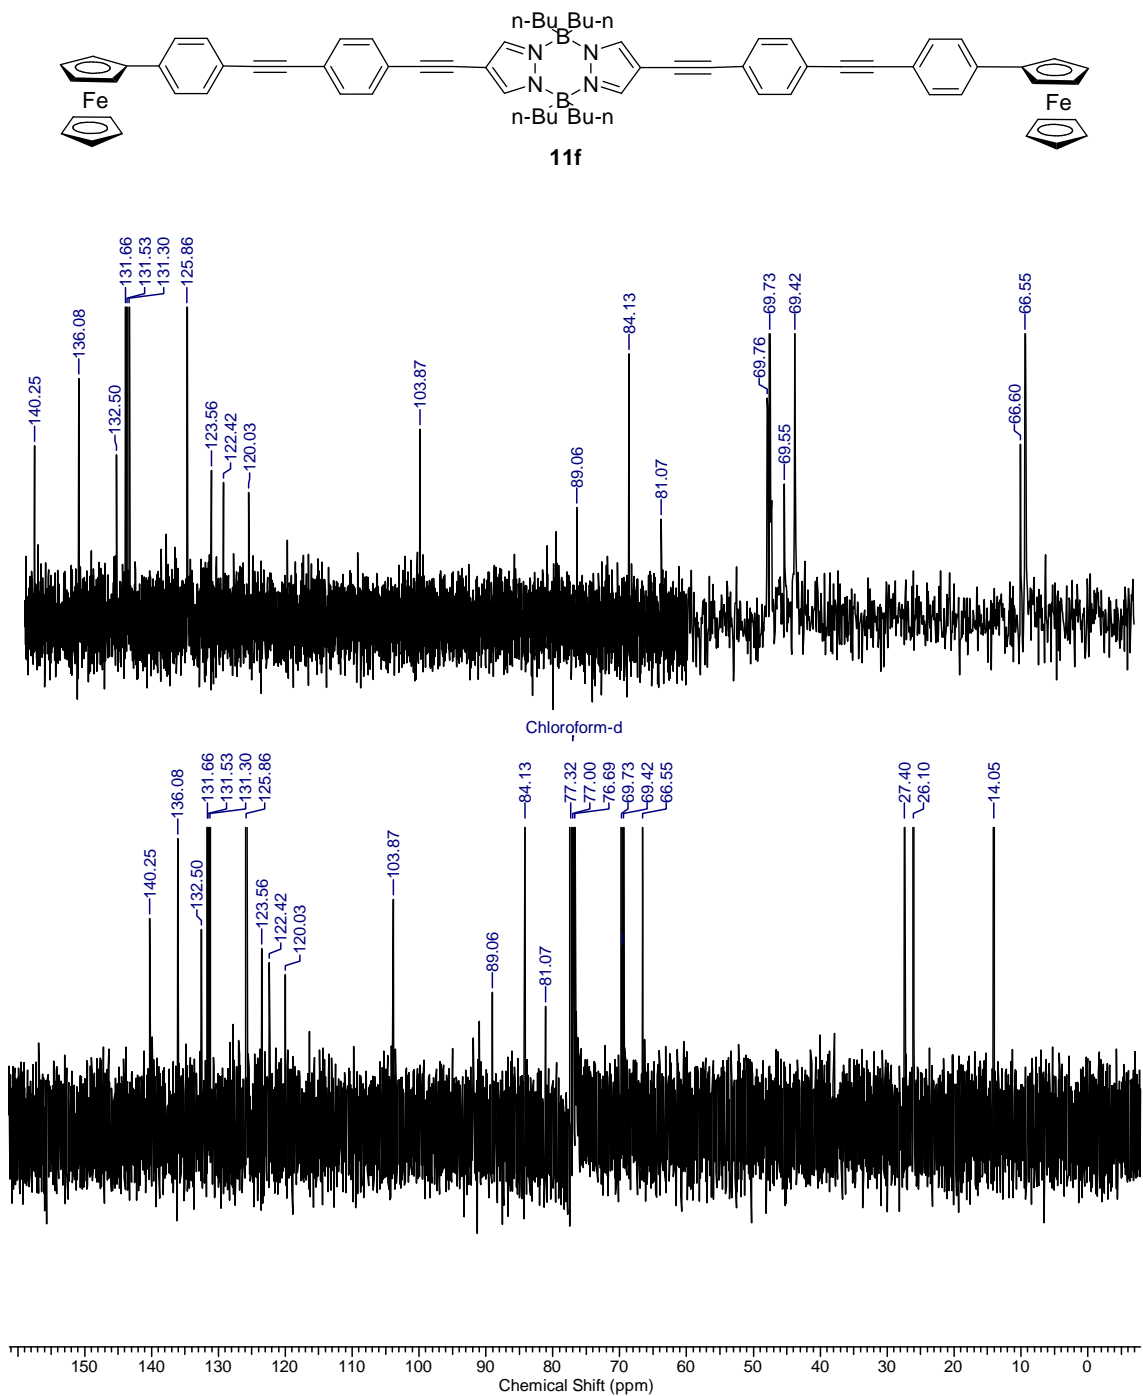

**Figure S-22:**  $^{13}\text{C}$ -NMR spectrum of compound **11f**.

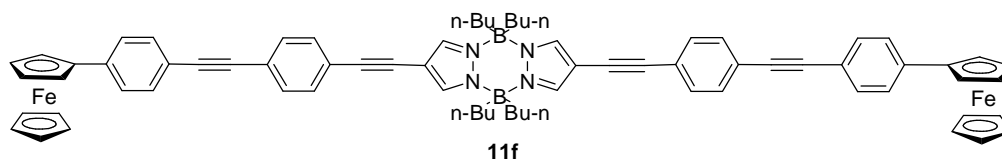

### Display Report

#### Analysis Info

Analysis Name D:\Data\UserData\RM-TJ-01-71 26-06-2012.d  
Method tune\_high.m  
Sample Name in chloroform  
Comment

Acquisition Date 6/26/2012 5:31:54 PM

Operator RAJESH VASHISTH  
Instrument micrOTOF-Q II 10348

#### Acquisition Parameter

|             |            |                       |            |                  |           |
|-------------|------------|-----------------------|------------|------------------|-----------|
| Source Type | ESI        | Ion Polarity          | Positive   | Set Nebulizer    | 0.4 Bar   |
| Focus       | Not active | Set Capillary         | 4500 V     | Set Dry Heater   | 180 °C    |
| Scan Begin  | 50 m/z     | Set End Plate Offset  | -500 V     | Set Dry Gas      | 4.0 l/min |
| Scan End    | 3000 m/z   | Set Collision Cell RF | 1600.0 Vpp | Set Divert Valve | Waste     |

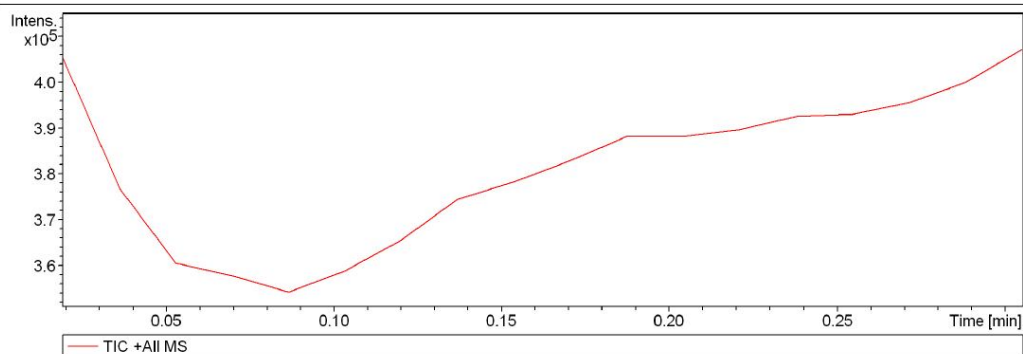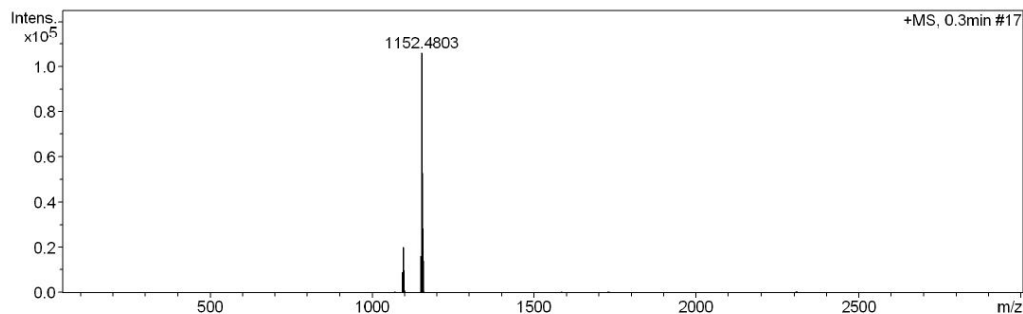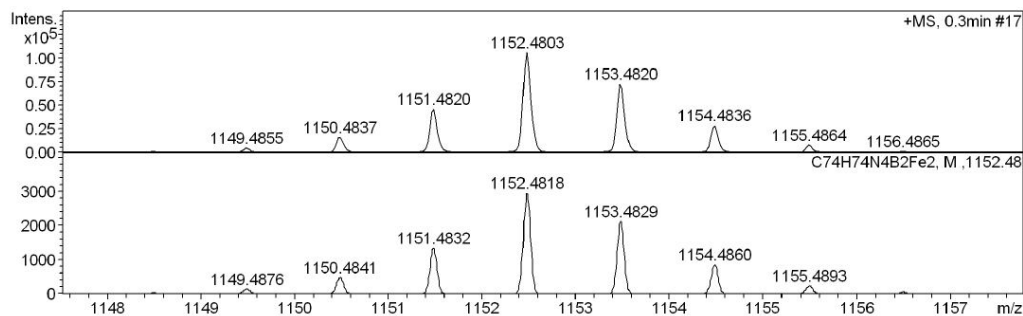

**Figure S-23: HRMS spectrum of compound 11f.**

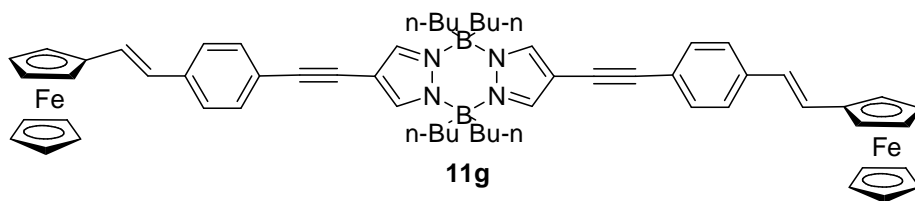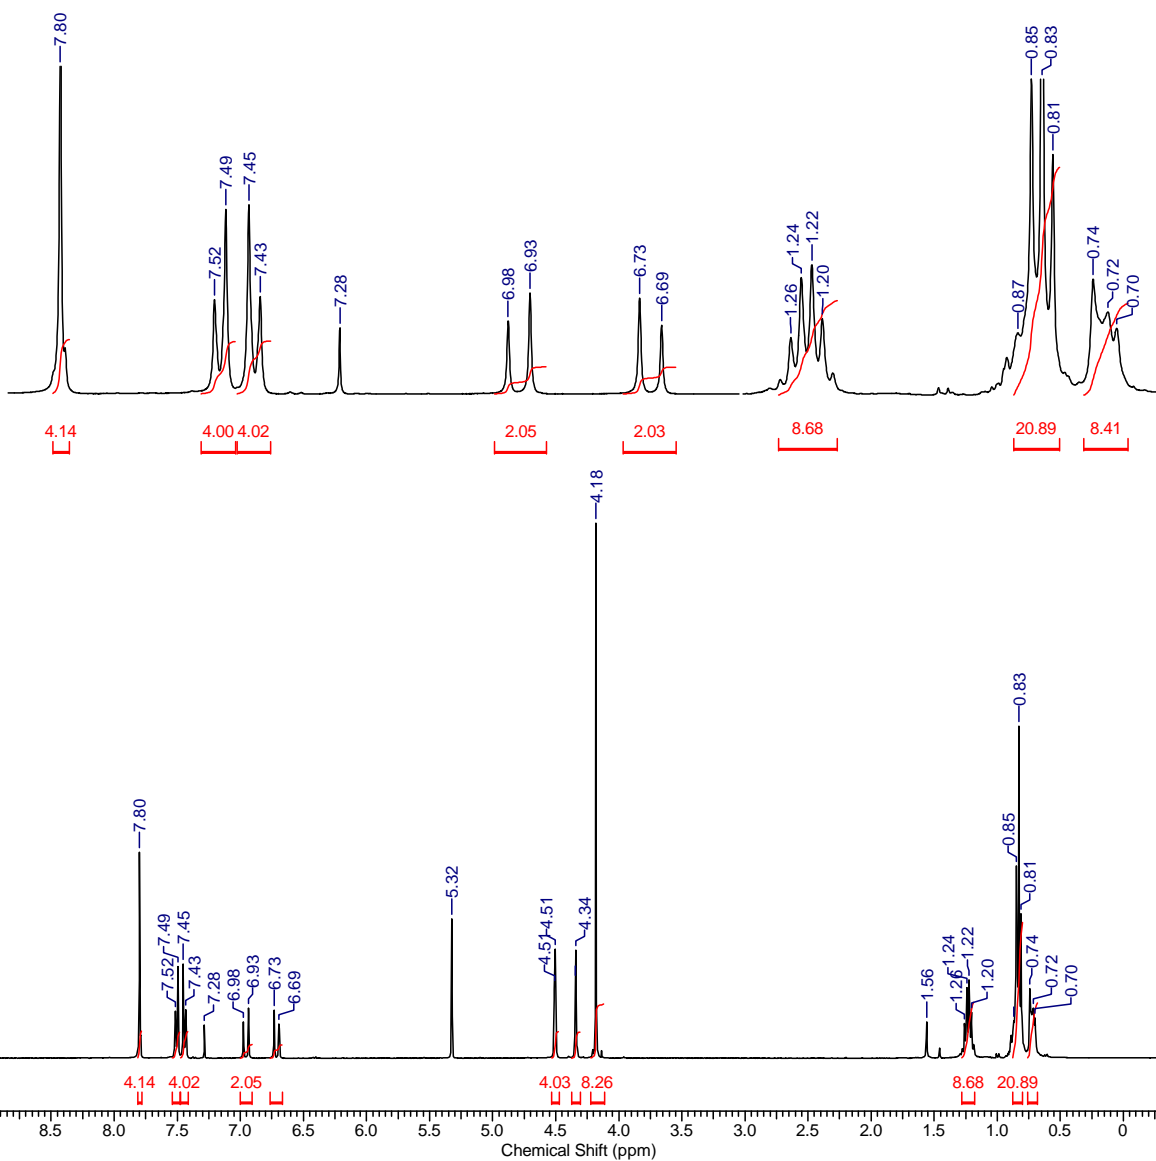

Figure S-24:  $^1\text{H-NMR}$  spectrum of compound **11g**.

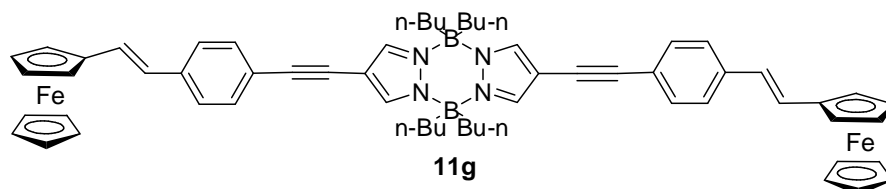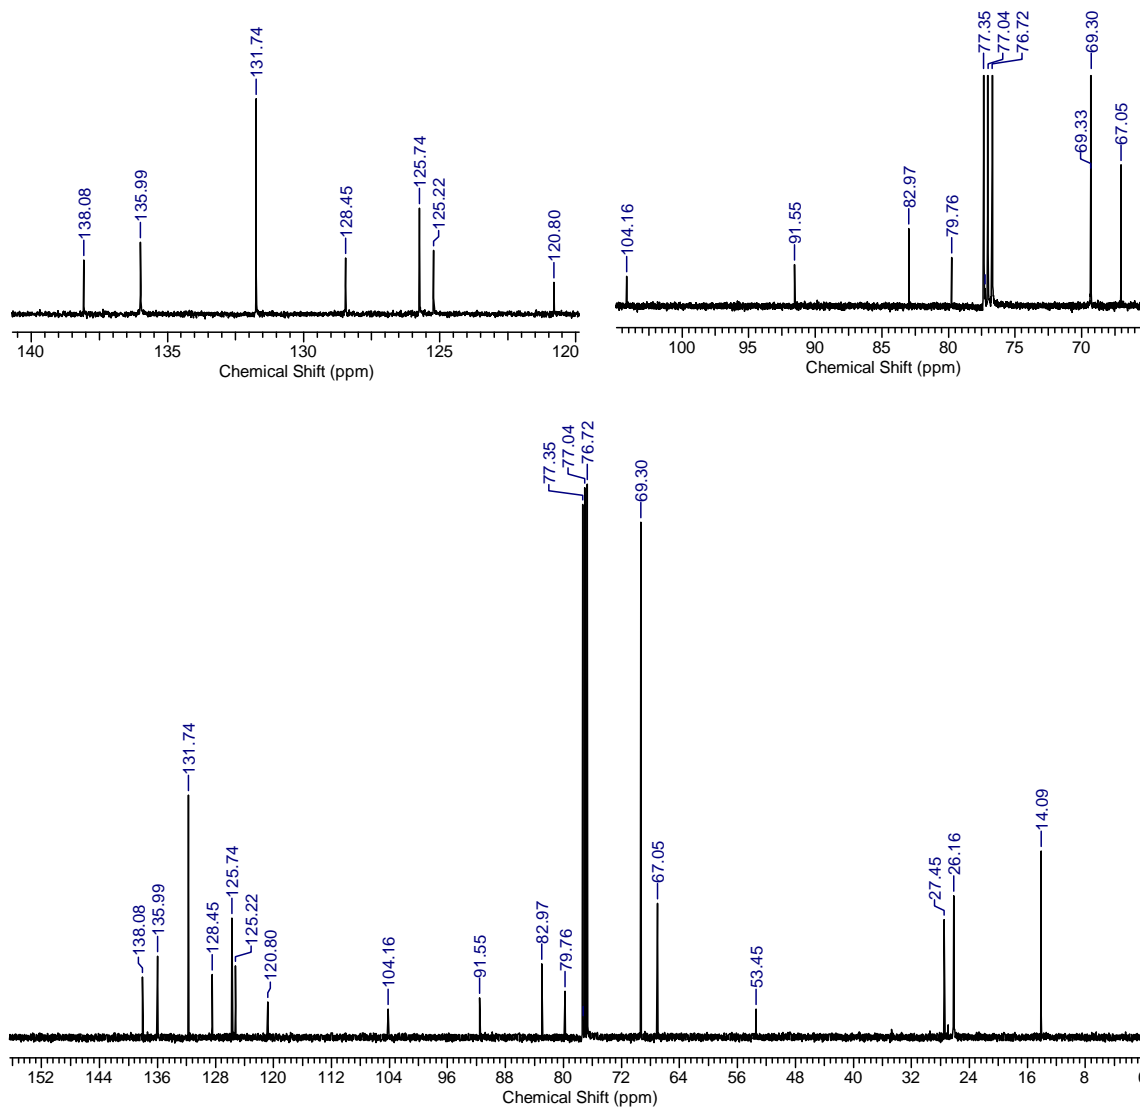

**Figure S-25:**  $^{13}\text{C}$ -NMR spectrum of compound **11g**.

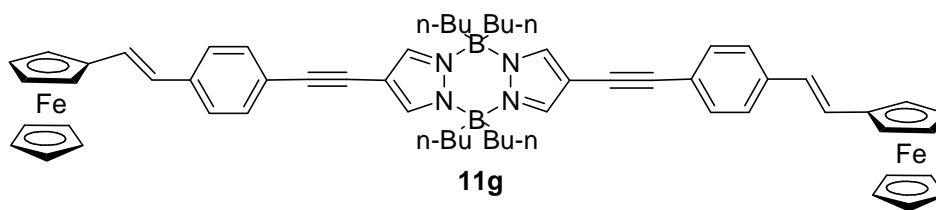

### Display Report

|                      |                                           |                      |                     |
|----------------------|-------------------------------------------|----------------------|---------------------|
| <b>Analysis Info</b> | Acquisition Date                          | 5/23/2013 3:32:07 PM |                     |
| Analysis Name        | D:\Data\May 2013\RM-TJ-01-73 23-05-2013.d |                      |                     |
| Method               | tune_wide.m                               | Operator             | Ghanashyam Bhavsar  |
| Sample Name          | O                                         | Instrument           | micrOTOF-Q II 10348 |
| Comment              |                                           |                      |                     |

|                              |            |                       |           |                  |           |
|------------------------------|------------|-----------------------|-----------|------------------|-----------|
| <b>Acquisition Parameter</b> |            |                       |           |                  |           |
| Source Type                  | ESI        | Ion Polarity          | Positive  | Set Nebulizer    | 0.4 Bar   |
| Focus                        | Not active | Set Capillary         | 4500 V    | Set Dry Heater   | 180 °C    |
| Scan Begin                   | 50 m/z     | Set End Plate Offset  | -500 V    | Set Dry Gas      | 4.0 l/min |
| Scan End                     | 3000 m/z   | Set Collision Cell RF | 650.0 Vpp | Set Divert Valve | Waste     |

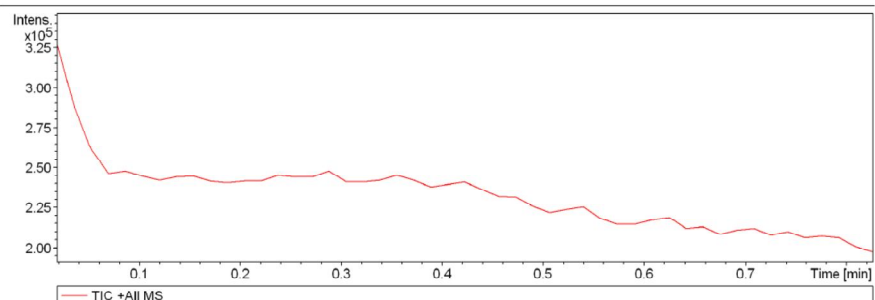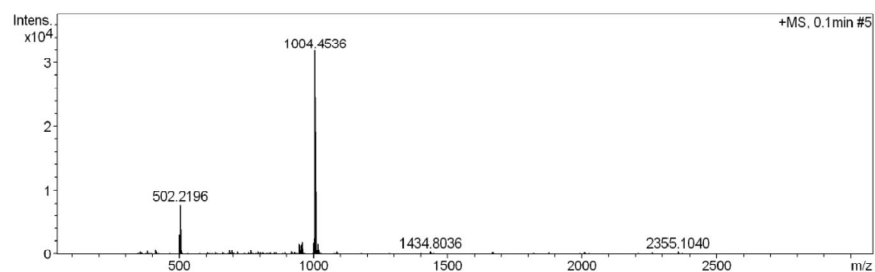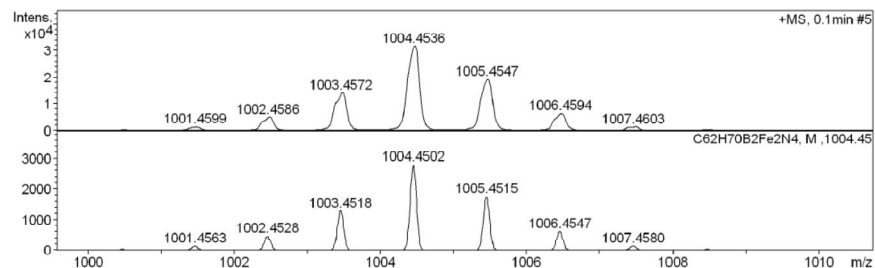

**Figure S-26: HRMS spectrum of compound 11g.**
